# Supplementary material
Source: publisher figshare collection journal article supplement (https://acs.figshare.com/ndownloader/files/5169112)
Supplement: Supplementary file 1 [file 5169112]

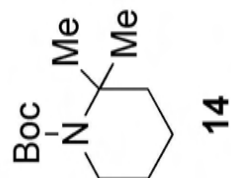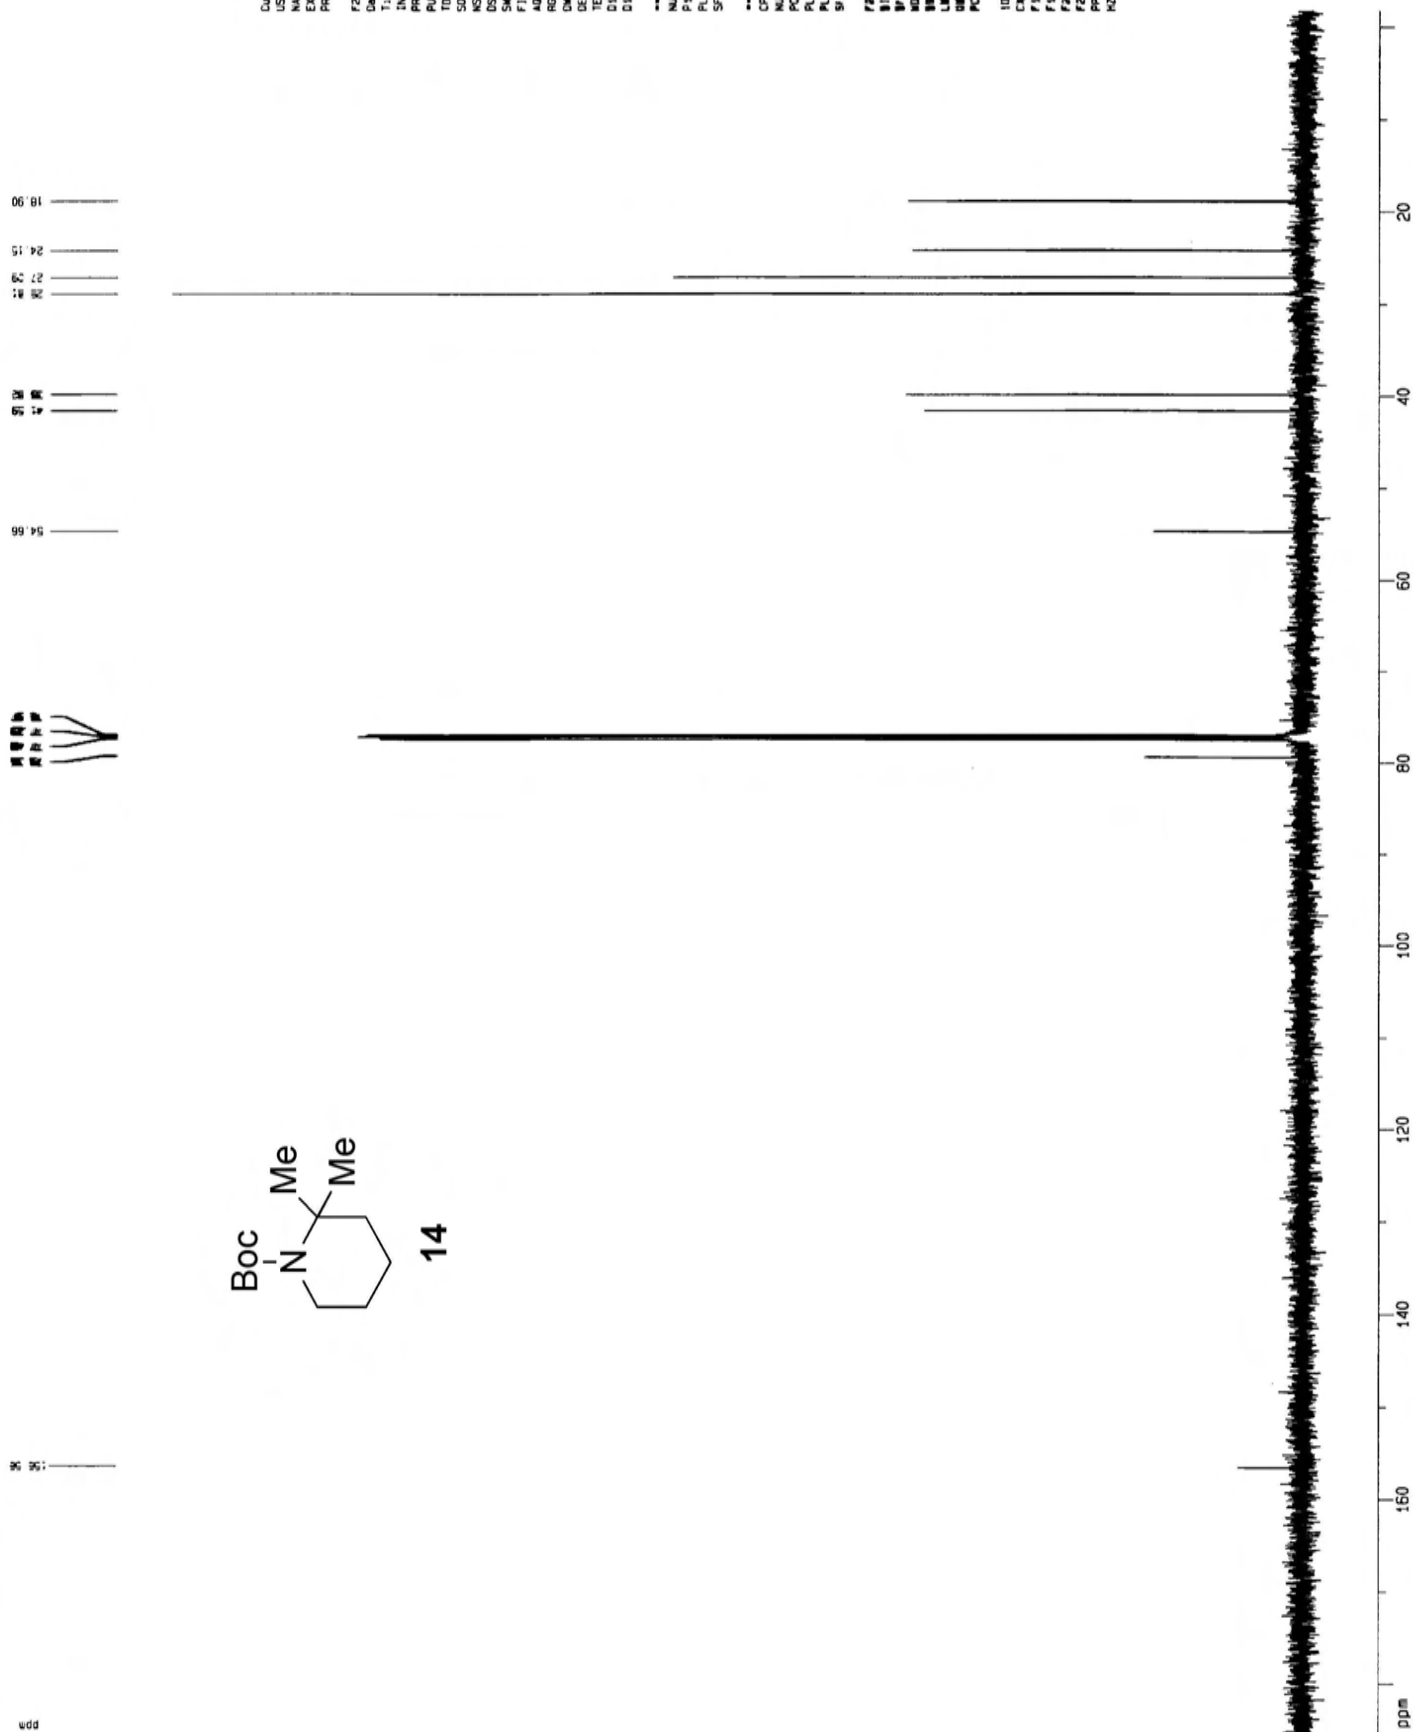

0.86449  
0.87889  
0.89138  
1.26564  
1.37575  
1.45592  
1.46060  
1.56987  
1.57570

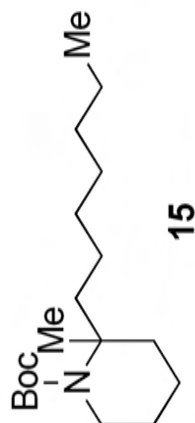

Current Data Parameters  
USER: swick  
NAME: 11119  
EXPNO: 3  
PROCNO: 1  
F2 - Acquisition Parameters  
Date\_: 20040124  
Time: 17:55  
INSTRUM: omega500  
PROBHD: 5 mm broadband  
PULPROG: zg30  
TD: 65536  
SOLVENT: CDCl3  
NS: 6  
DS: 2  
SWH: 8012.820 Hz  
FIDRES: 0.122268 Hz  
AQ: 4.089455 sec  
RG: 327.5  
DM: 62.400 usec  
DE: 6.00 usec  
TE: 300.0 K  
D1: 0.10000000 sec  
\*\*\*\*\* CHANNEL f1 \*\*\*\*\*  
NUC1: 1H  
P1: 13.00 usec  
PL1: -1.00 dB  
SFO1: 500.225015 MHz  
F2 - Processing parameters  
SI: 65536  
SF: 500.2200175 MHz  
WDW: EM  
SSB: 0  
LB: 0.30 Hz  
GB: 0  
PC: 4.00  
RG: 327.5  
FIR: 22.80 cm  
FIR: 9.455 DDM  
F1: 4629.35 Hz  
F2P: -0.414 DDM  
F2: -207.26 Hz  
PRNOM: 0.42408 DDM/cm  
HZCM: 212.13354 Hz/cm

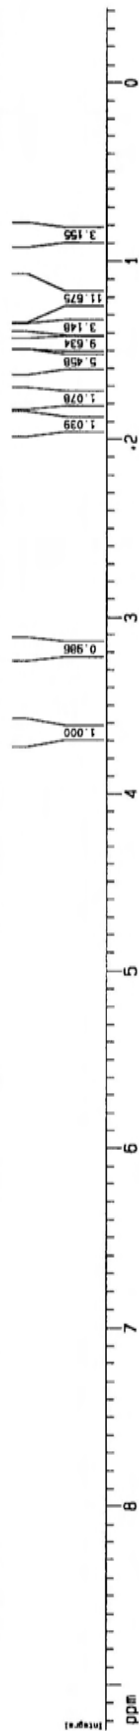

13C spectrum with 1H decoupling

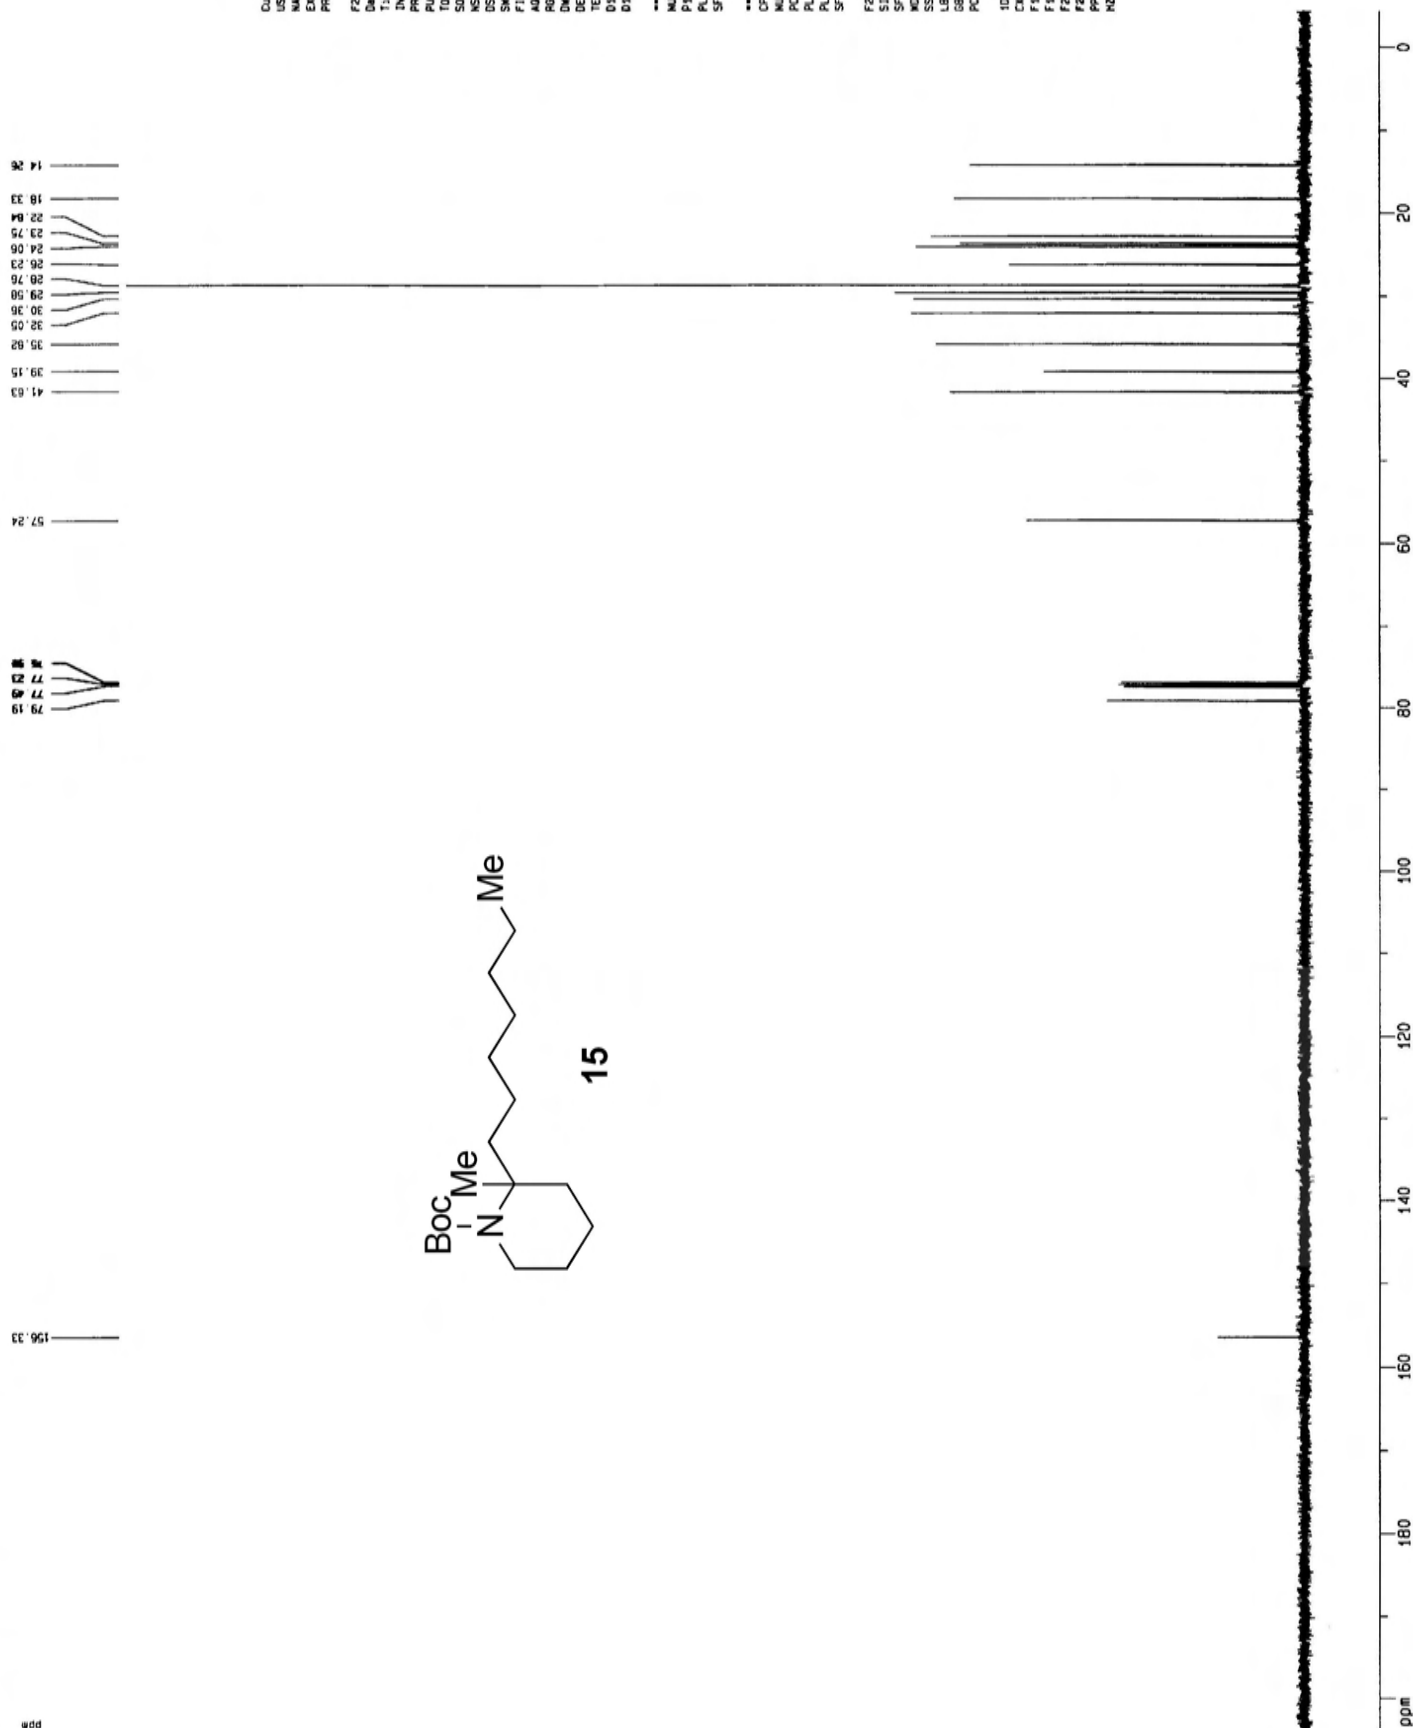

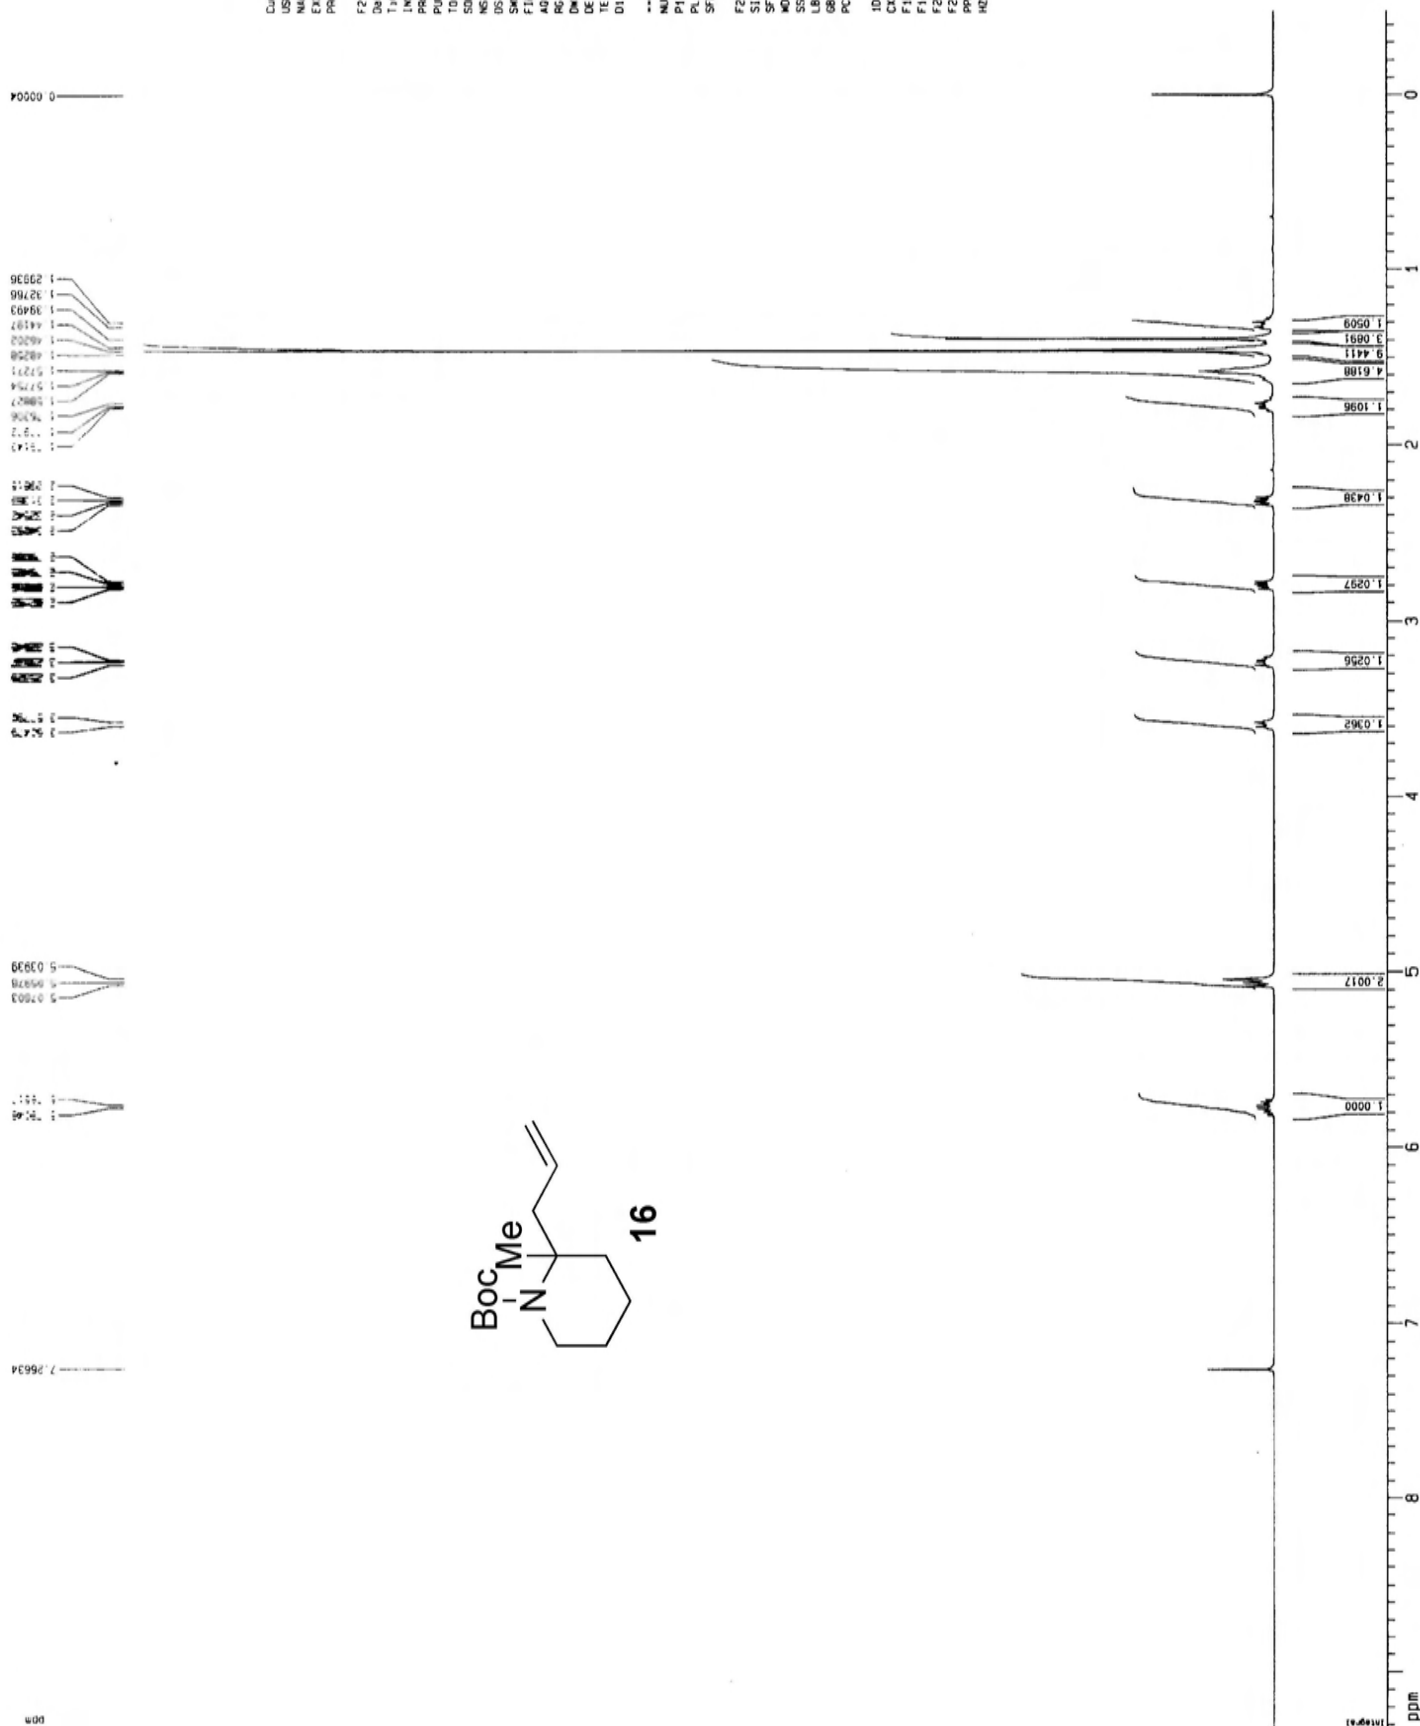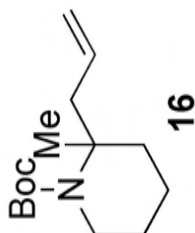

Spectrum with 1H decoupling

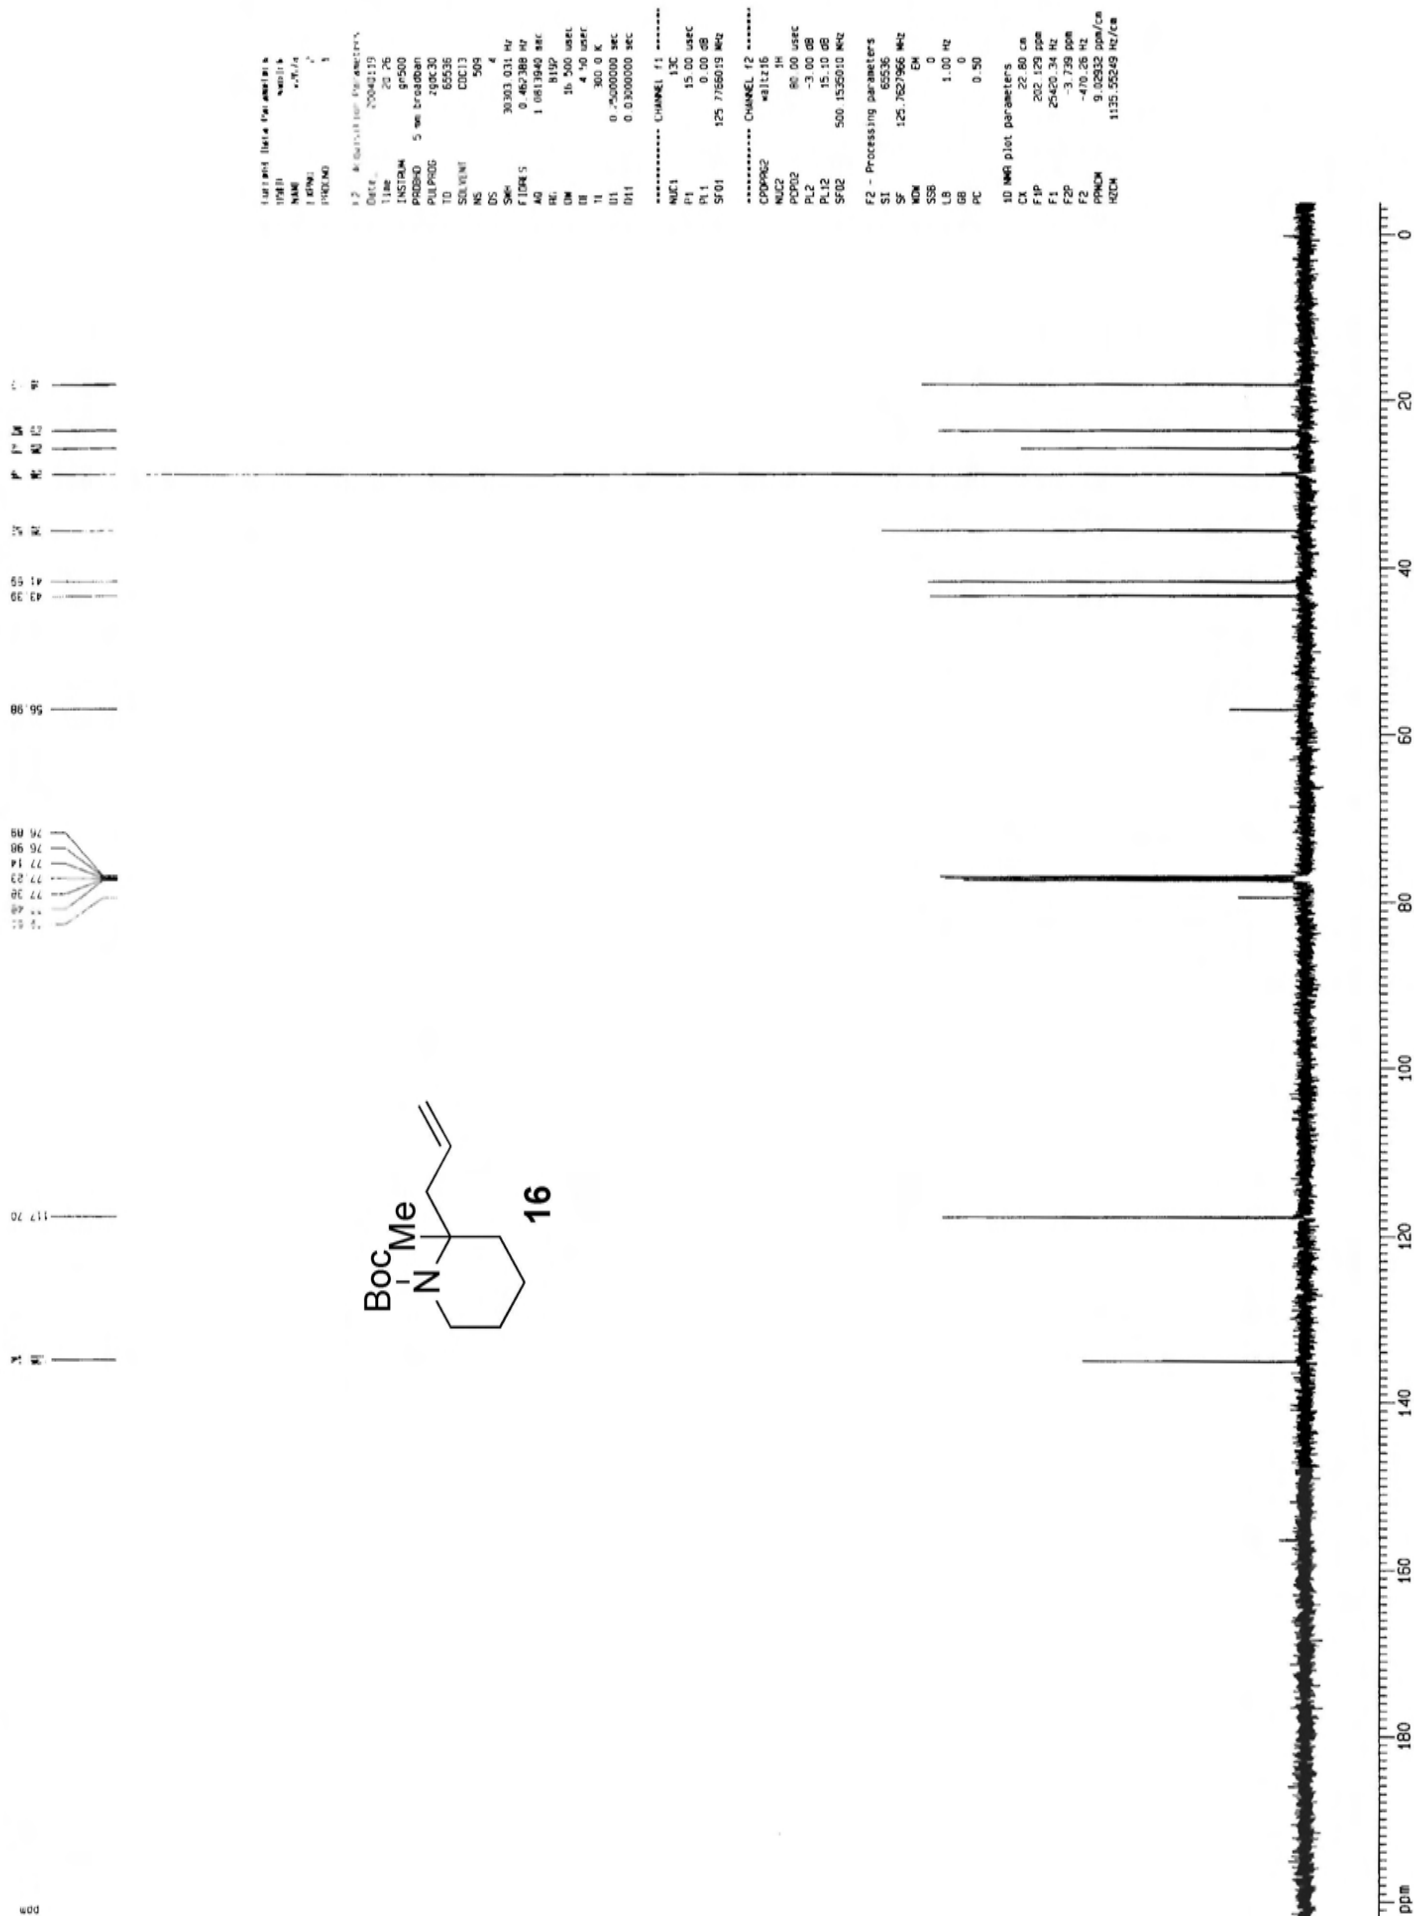

SMA-V-2894  
500 MHz  
CDCl<sub>3</sub>  
3H Spin (F1)

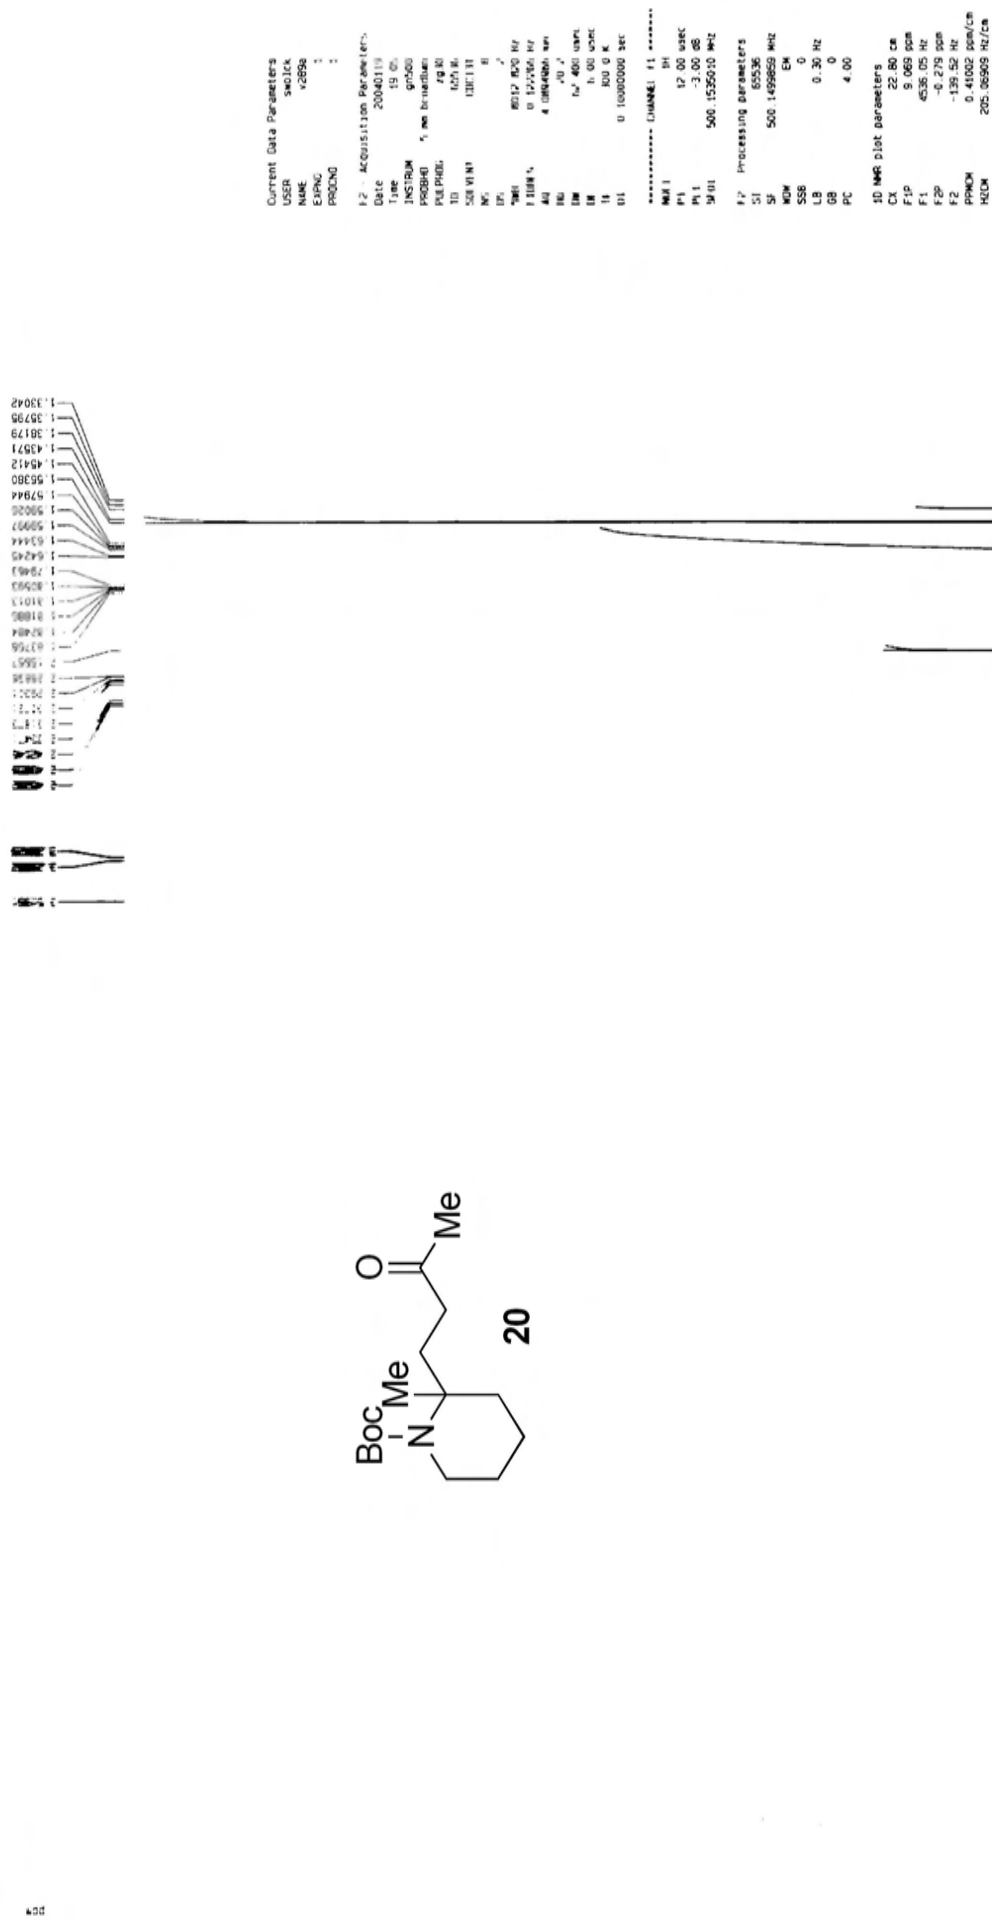

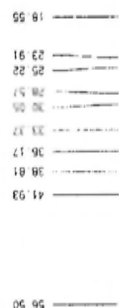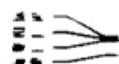

20

1.03

1.03  
1.93  
3.81  
3.67  
3.37  
3.05  
2.87  
2.57  
2.22  
2.01  
1.91  
1.55

ppm

1.03  
1.93  
3.81  
3.67  
3.37  
3.05  
2.87  
2.57  
2.22  
2.01  
1.91  
1.55

1.03

1.93

3.81

3.67

3.37

3.05

2.87

2.57

2.22

2.01

1.91

1.55

ppm

Current Data Parameters  
Date: 20200111  
Time: 11:17  
Sample: 20  
Pulse: 12.00  
F1: 400.140 MHz  
F2: 100.625 MHz  
SOLVENT: CDCl3  
NS: 1024  
DS: 4  
SWH: 10.000 MHz  
FID: 0.4000000 Hz  
AQ: 1.0010000 sec  
RG: 327.680  
GB: 0.0000000  
PC: 2.00  
SFO: 125.762983 MHz  
SF: 65536  
WDW: EM  
SSB: 0  
LB: 1.00 Hz  
GB: 0  
PC: 2.00  
10 MHz plot parameters  
CX: 22.60 cm  
F1P: 223.565 ppm  
F1: 28166.55 Hz  
F2P: -2.283 ppm  
F2: -287.16 Hz  
PNUC: 9.92200 ppm/cm  
HZCM: 1247.95936 Hz/cm

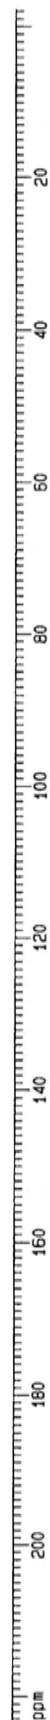

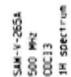



13C spectrum with 1H decoupling

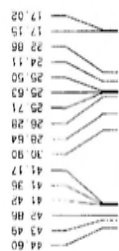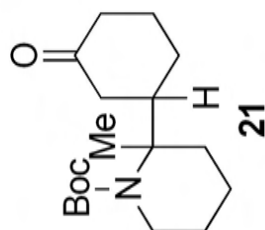

Current Data Parameters  
 USER: swdck  
 NAME: 2055a  
 EXPNO: 2  
 PROCNO: 1

F2 Acquisition Parameters  
 Date\_: 20040119  
 Time: 20.12  
 INSTRUM: spect  
 PULPROG: zgpg30  
 FIDRES: 0.00030  
 F0: 65536  
 SFO1: 125.76019 MHz  
 AQ: 0.462388 sec  
 RG: 6132  
 DQ: 16.500000 sec  
 DE: 4.500000 sec  
 TE: 300.2 K  
 D1: 0.25000000 sec  
 D11: 0.03000000 sec

----- CHANNEL f1 -----  
 NUC1: 13C  
 P1: 15.00 usec  
 PL1: 0.00 dB  
 SFO1: 125.76019 MHz

----- CHANNEL f2 -----  
 CPDPRG2: waltz16  
 NUC2: 1H  
 P2: 80.00 usec  
 PL2: 0.00 dB  
 PL12: 19.00 dB  
 SFO2: 500.135050 MHz

F2 - Processing parameters  
 SI: 65536  
 SF: 125.7628068 MHz  
 WDW: EM  
 SSB: 0  
 LB: 1.00 Hz  
 GB: 0  
 PC: 1.00

1D NMR plot parameters  
 CX: 22.80 cm  
 FIP: 228.520 ppm  
 F1: 28865.04 Hz  
 F2: -10.507 ppm  
 F2: -1321.34 Hz  
 PPM0: 10.32747 ppm/cm  
 PPM1: 1323.96395 Hz/cm

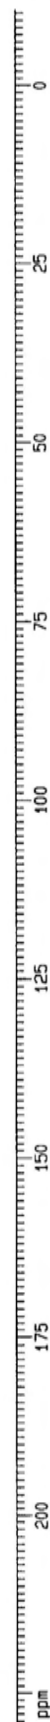

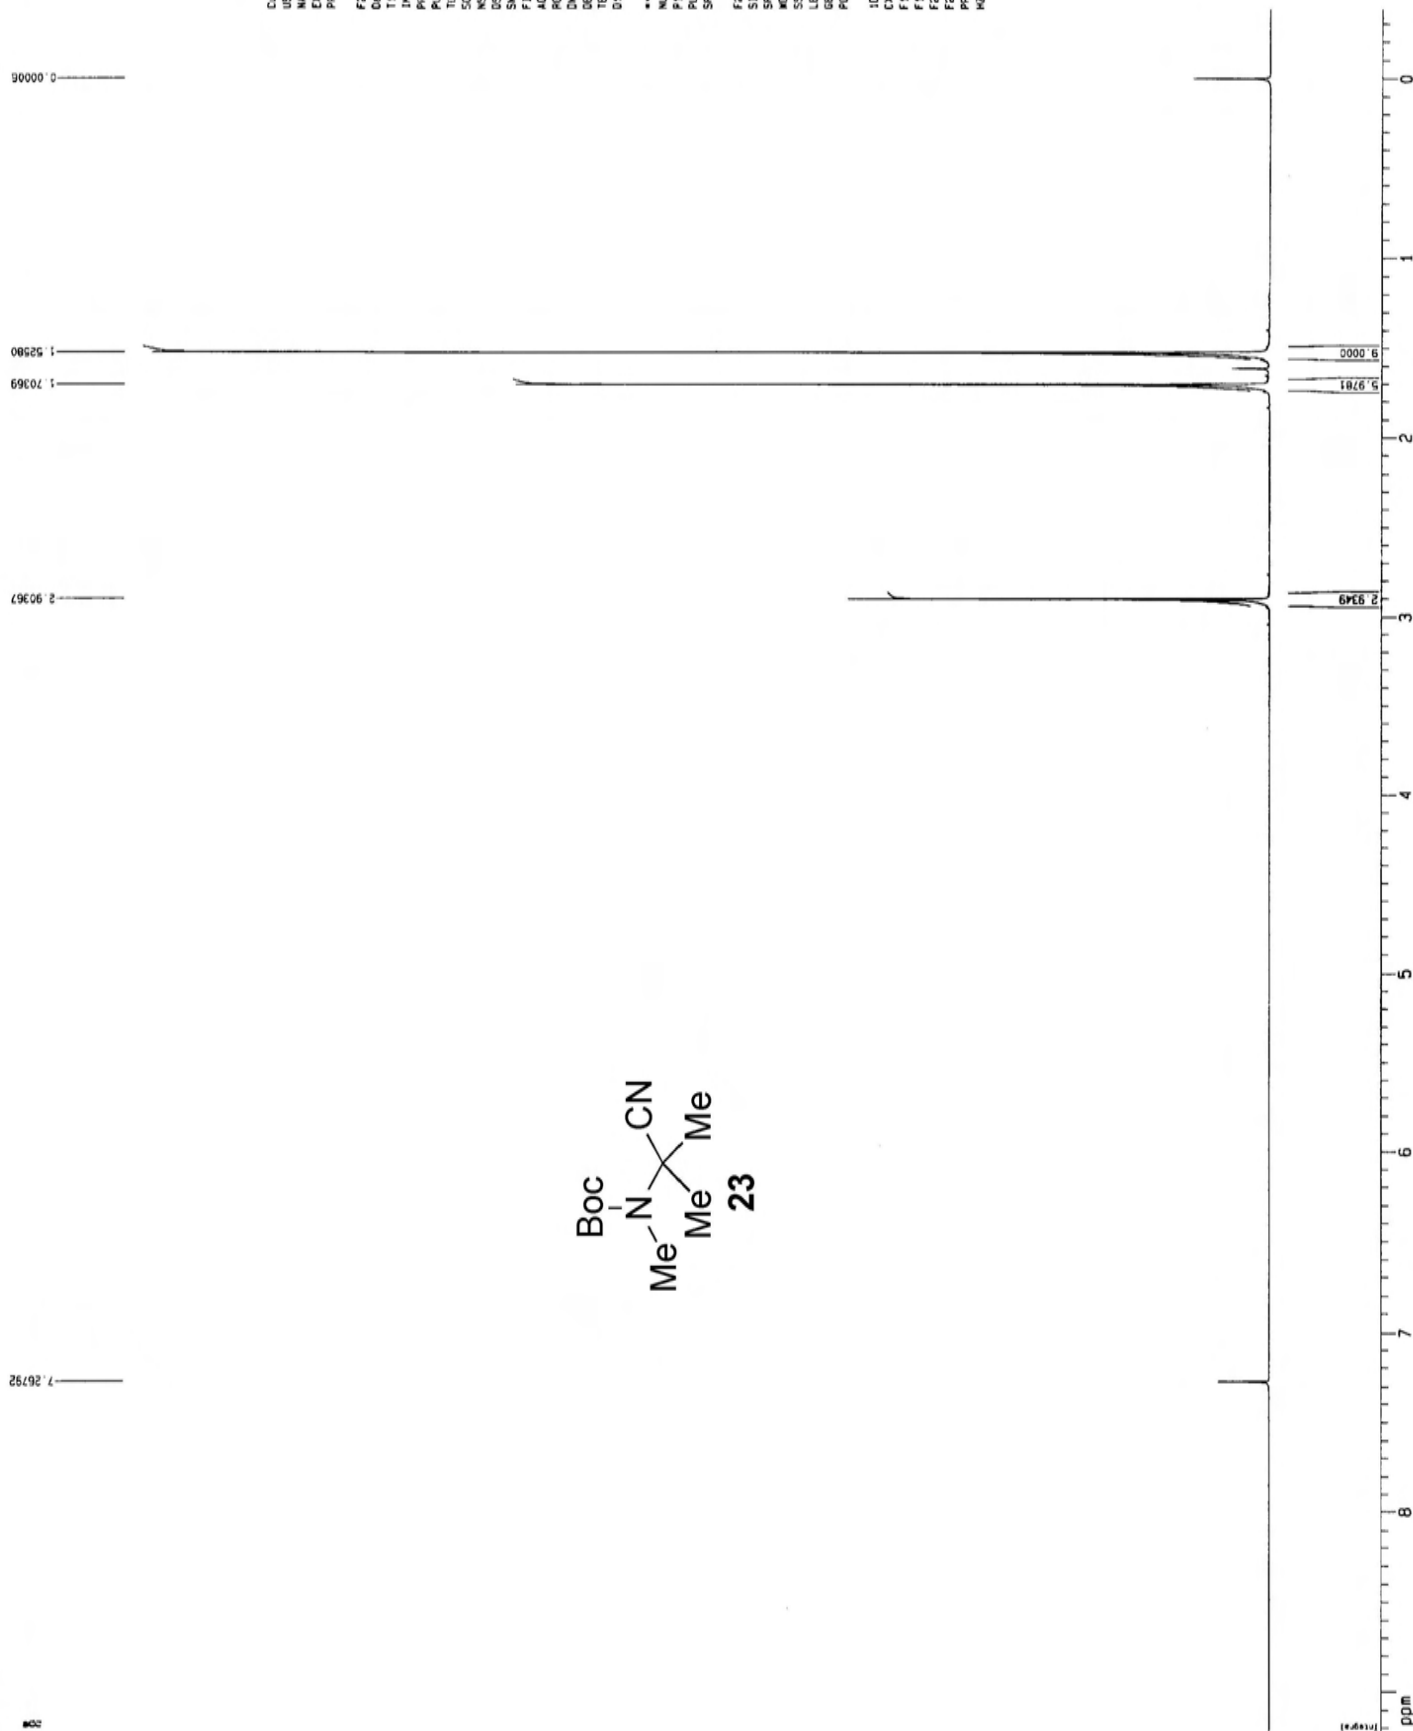

Current Data Parameters  
 USER: SWICK  
 NAME: Y2580  
 EXPNO: 1  
 PROCNO: 1

F2 - Acquisition Parameters  
 Date\_: 20040404  
 Time: 11:45  
 INSTRUM: spect  
 PROBHD: 5 mm broadband  
 PULPROG: zgpg30  
 TD: 8192  
 SOLVENT: DMSO  
 NS: 8  
 DS: 2  
 SWH: 8012.820 Hz  
 FIDRES: 0.088043 Hz  
 AQ: 0.0001414 sec  
 RG: 400  
 DM: 62.400 uS  
 DE: 6.00 uS  
 TE: 300.0 K  
 D1: 0.10000000 sec

\*\*\*\*\* CHANNEL f1 \*\*\*\*\*  
 NUC1: <sup>1</sup>H  
 P1: 13.00 uS  
 PL1: -1.00 dB  
 SF01: 500.2235015 MHz

F2 - Processing parameters  
 SI: 65536  
 SF: 500.2200270 MHz  
 WDM: 0  
 LB: 0.30 Hz  
 GB: 0  
 PC: 4.00

1D NMR plot parameters  
 CX: 22.80 cm  
 F1p: 9.219 ppm  
 F1: 4611.33 Hz  
 F2p: -0.382 ppm  
 F2: -191.25 Hz  
 PPM01: 0.42109 ppm/cm  
 MZCM: 210.63863 Hz/cm

13C spectrum with 3H decoupling

ppm

154.85

122.16

76.96  
77.23  
78.30

51.82

30.45  
30.50  
26.98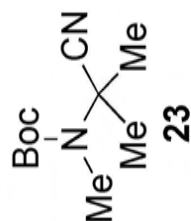

Current Data Parameters  
USER swick  
NAME y228  
EXPNO 2  
PROCNO 1

F2 Acquisition Parameters  
Date\_ 20040404  
Time 11:47  
INSTRUM spect  
PROBHD 1H 5mm  
PULPROG zgpg30  
TD 65536  
SOLVENT CDCl3  
NS 205  
DS 4  
SWH 30303.031 Hz  
FIDRES 0.462388 Hz  
AQ 1.0813940 sec  
RG 5160.0  
CW 15.500 usec  
DE 1.000 usec  
TE 300.2 K  
T1 0.25000000 sec  
D11 0.25000000 sec  
D111 0.03000000 sec

\*\*\*\*\* CHANNEL f1 \*\*\*\*\*  
NUC1 13C  
P1 22.50 usec  
PL1 -6.00 dB  
SFO1 125.7604048 MHz

\*\*\*\*\* CHANNEL f2 \*\*\*\*\*  
CPDPRG2 waltz16  
NUC2 1H  
P2 80.00 usec  
PL2 -1.00 dB  
SFO2 500.2250013 MHz

F2 - Processing parameters  
SI 65536  
SF 125.7603956 MHz  
WDW EM  
SSB 0  
LB 1.00 Hz  
GB 0  
PC 0.50

1D NMR plot parameters  
CX 22.80 cm  
F1P 200.218 ppm  
F1 29221.19 Hz  
F2P -2.295 ppm  
F2 -283.80 Hz  
PMD 8.89332 ppm/cm  
PC 1118.63086 Hz/cm

ppm

150

140

120

100

80

60

40

20

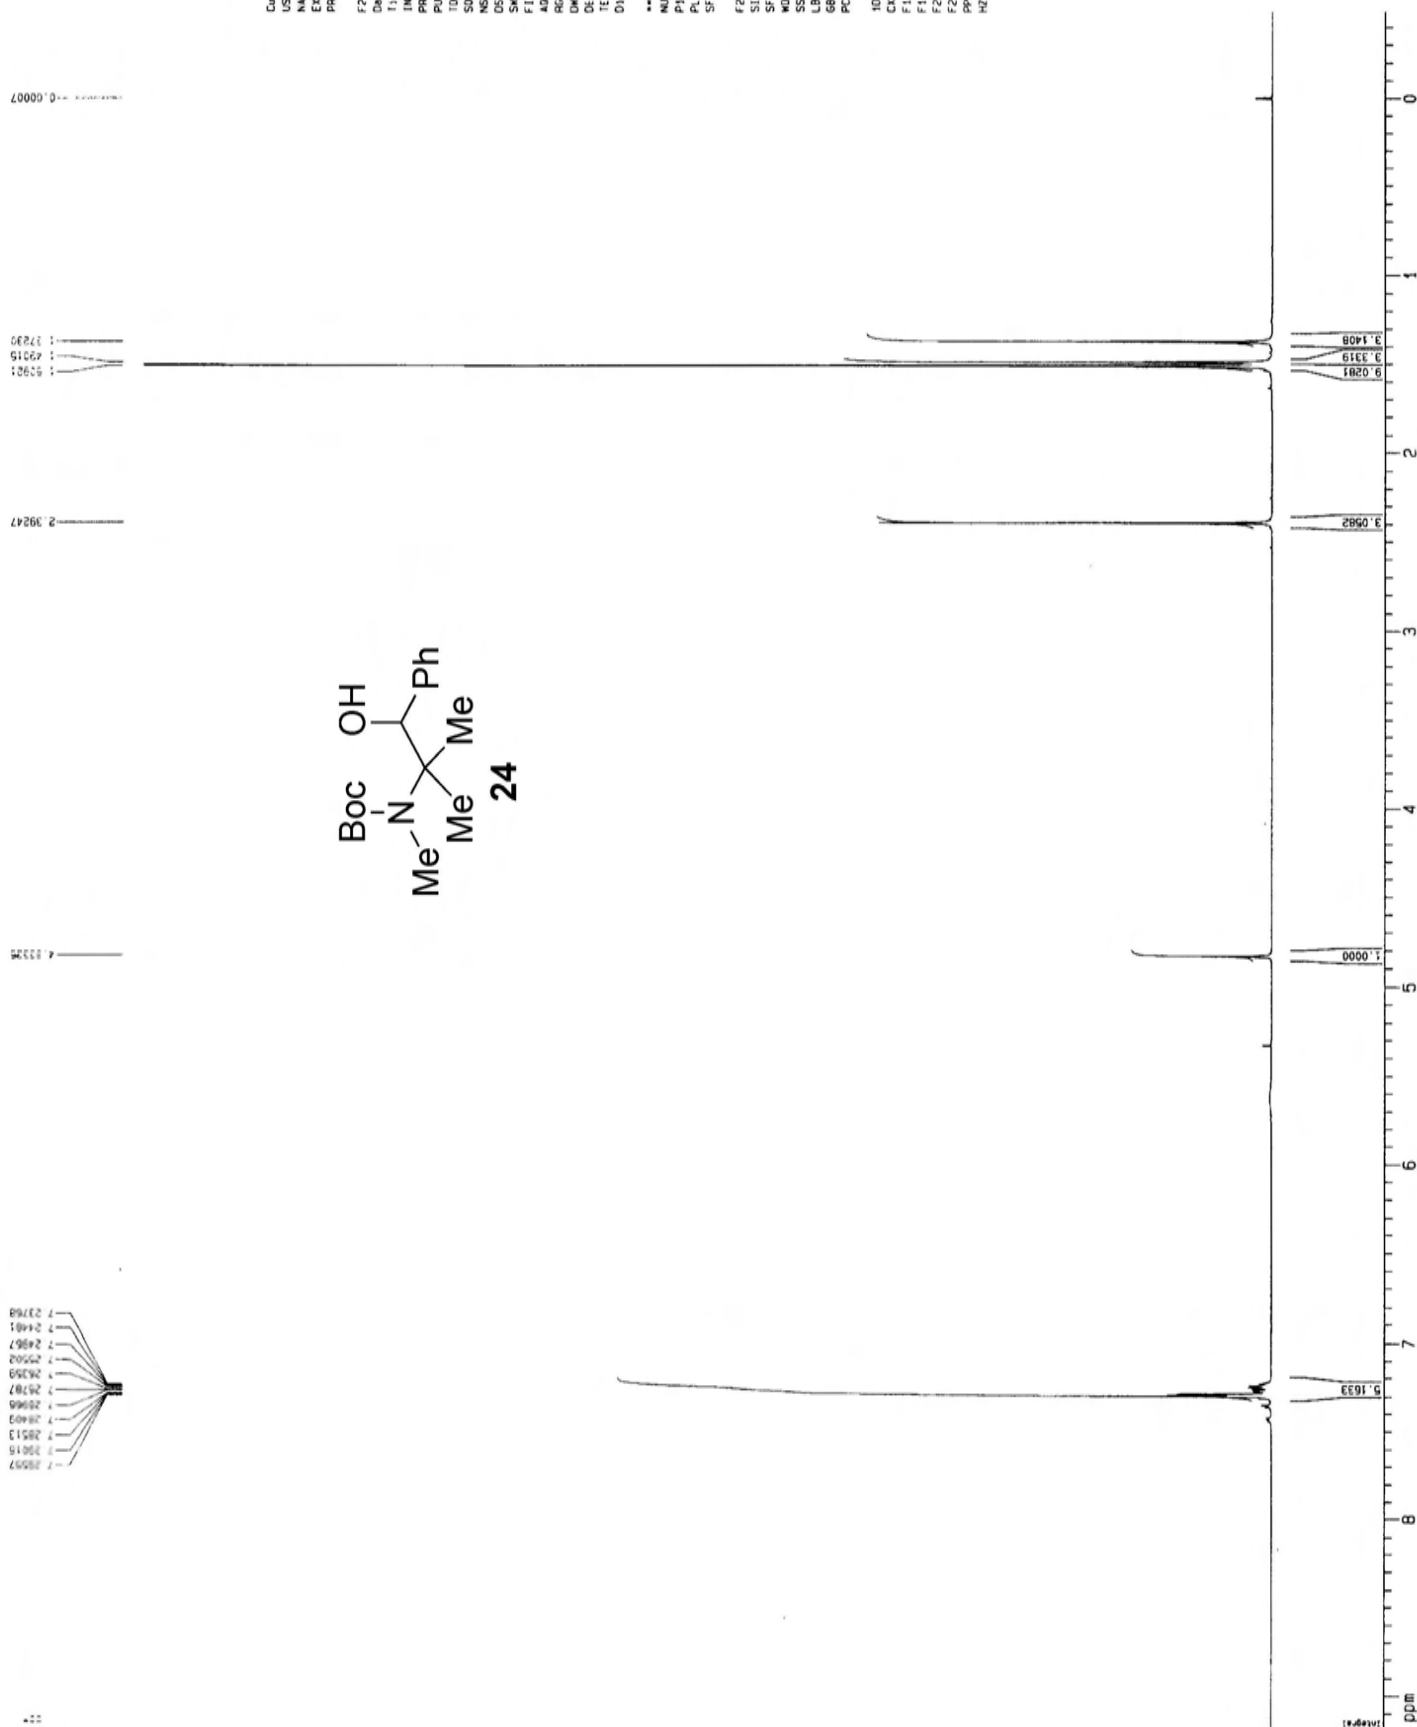

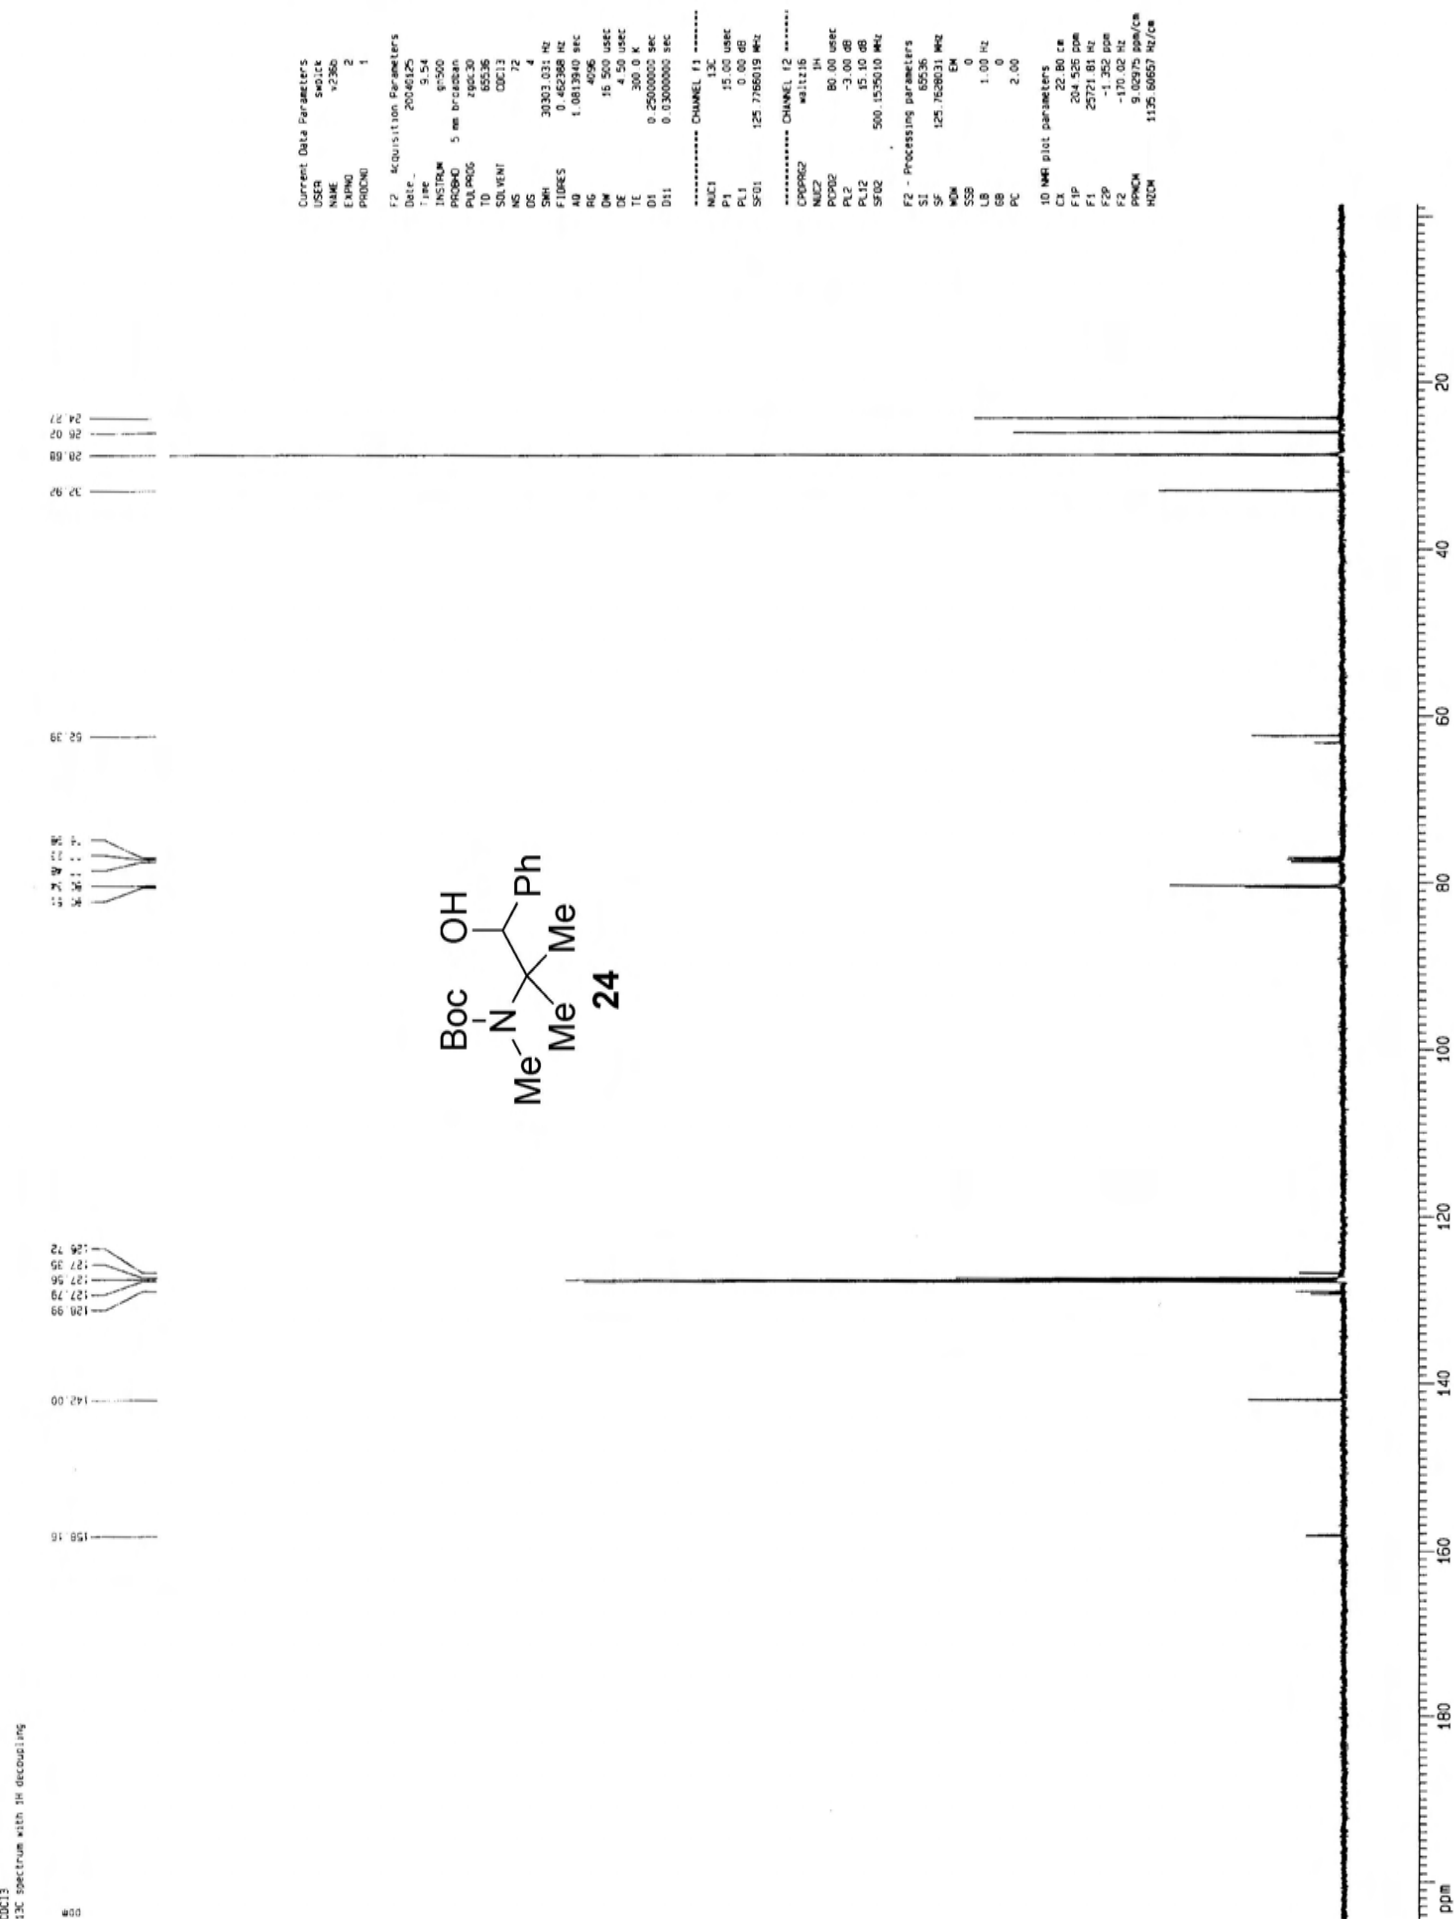

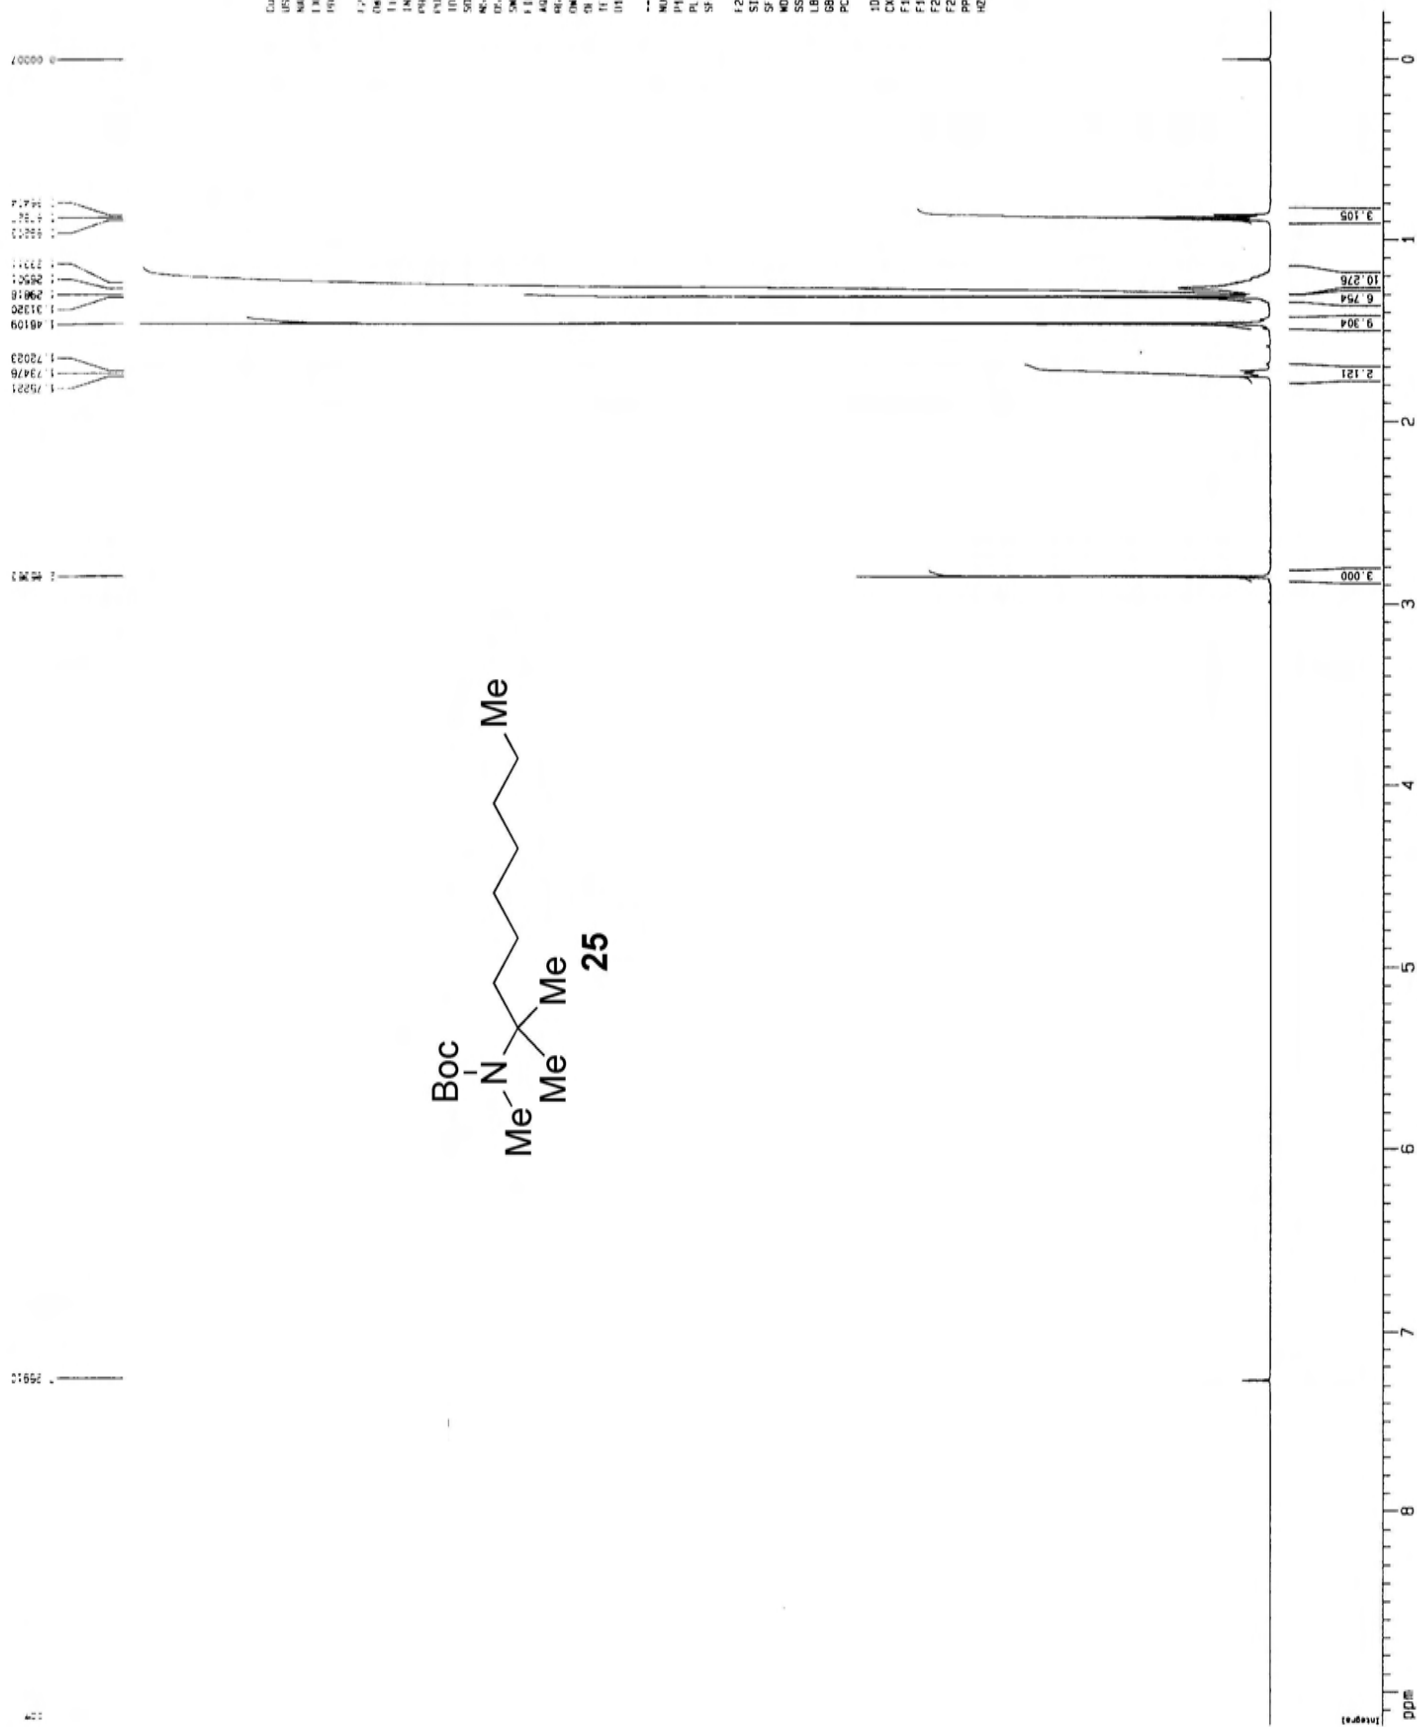

run with 1H decoupling

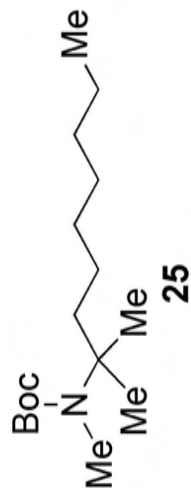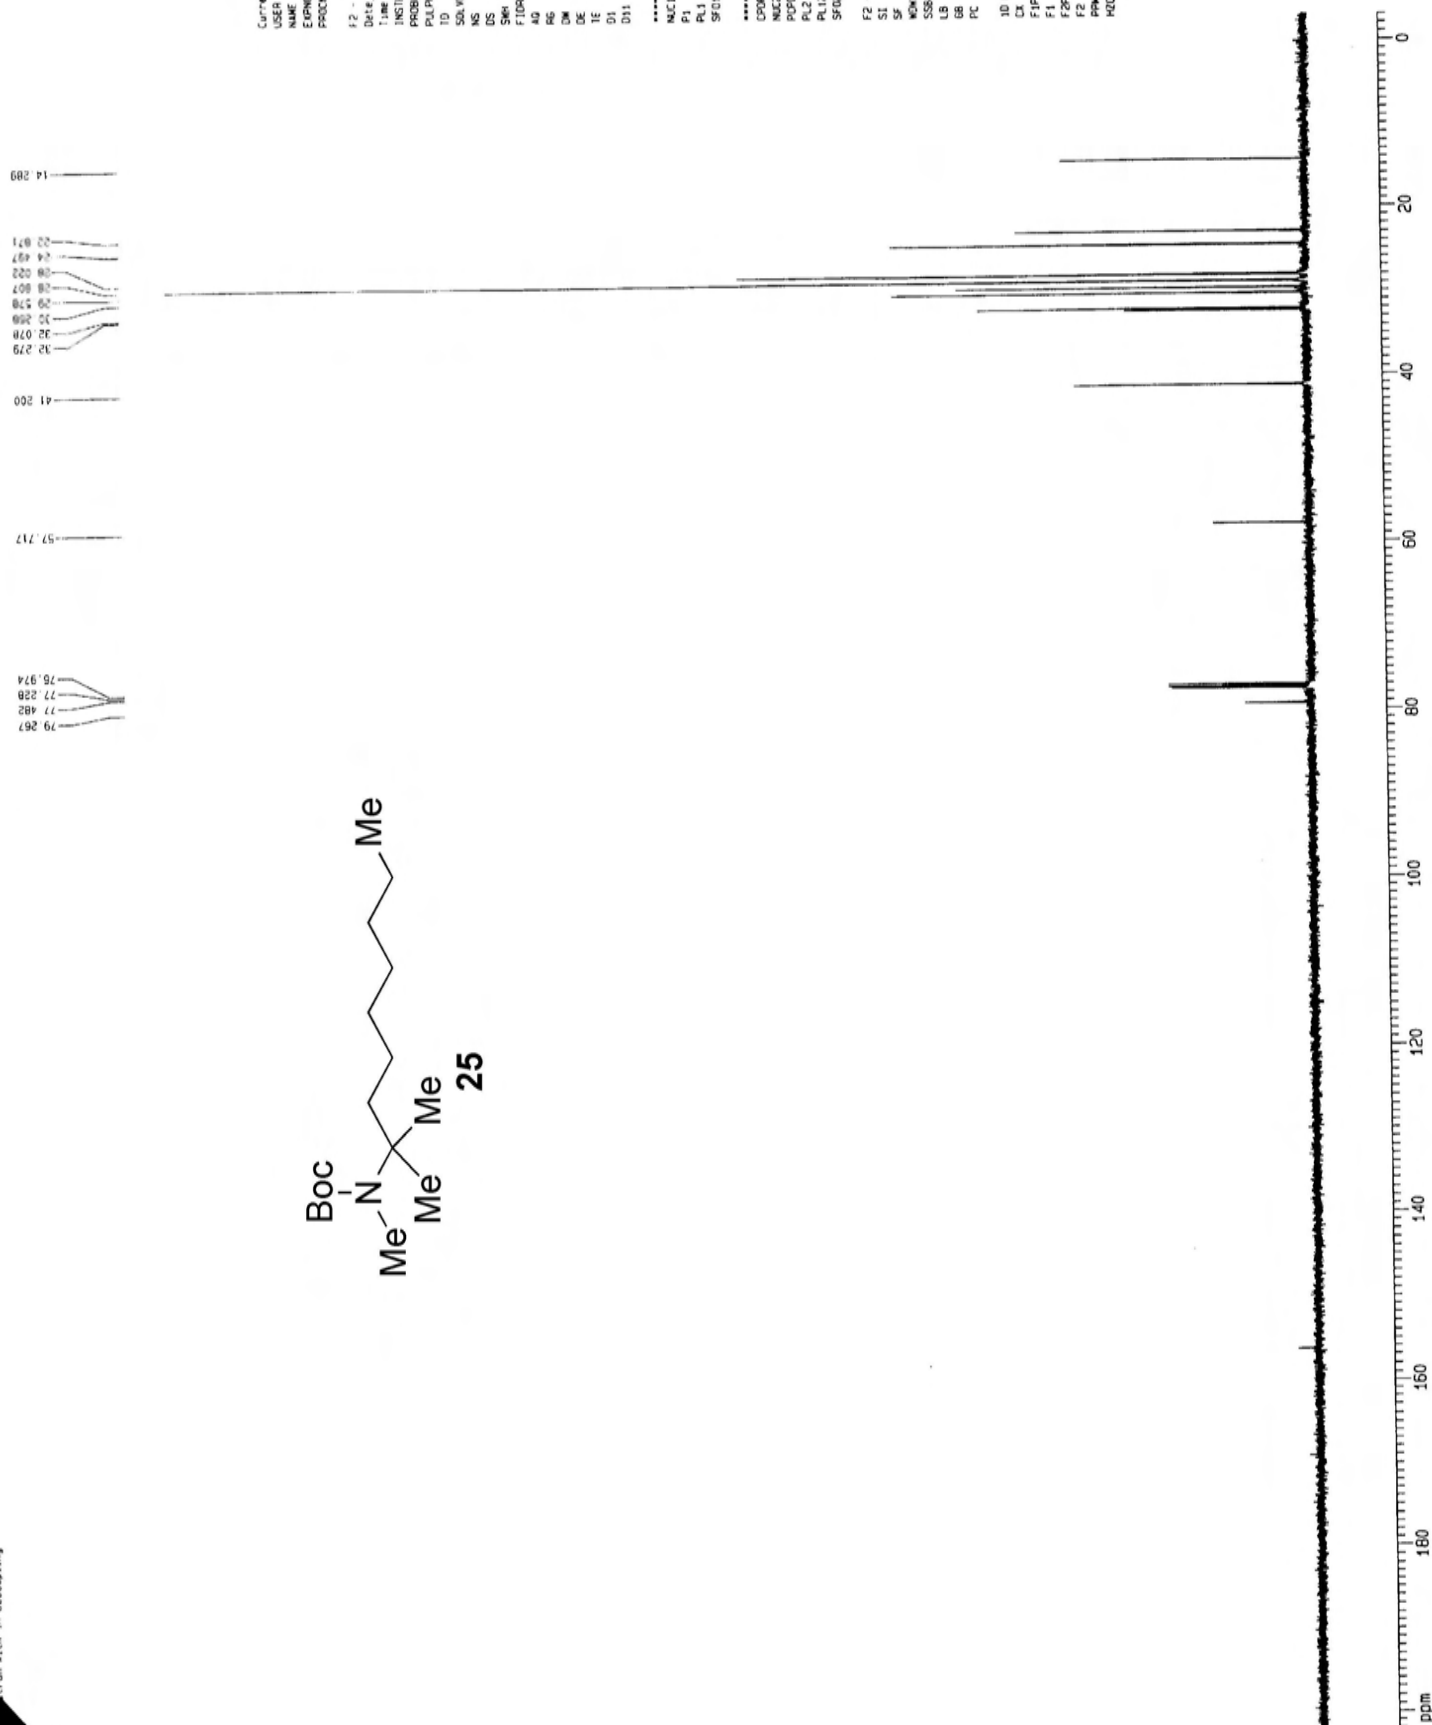

Current Data Parameters  
 USER: srolick  
 NAME: x271b  
 EXPNO: 2  
 PROCNO: 1

F2 - Acquisition Parameters  
 Date\_: 20040125  
 Time: 10.09  
 INSTRUM: spect  
 PULPROG: zgpg30  
 SOLVENT: CDCl3  
 NS: 1024  
 DS: 4  
 SWH: 3033.031 Hz  
 FIDRES: 0.45238 Hz  
 AQ: 1.081598 sec  
 RG: 327.5  
 DB: 15.500 usec  
 DE: 4.50 usec  
 TE: 300.2 K  
 D1: 0.2500000 sec  
 D11: 0.0300000 sec

===== CHANNEL f1 =====  
 NUC1: 13C  
 P1: 15.00 usec  
 PL1: 0.00 dB  
 SF01: 125.776519 MHz

===== CHANNEL f2 =====  
 CDP062: zgpg30  
 NUC2: 1H  
 P2: 80.00 usec  
 PL2: -3.00 dB  
 PL12: 15.10 dB  
 SF02: 500.1535019 MHz

F2 - Processing parameters  
 SI: 65536  
 SF: 125.7627948 MHz  
 WDM: EM  
 SSF: 0  
 LB: 1.00 Hz  
 GB: 0  
 PC: 1.00

1D NMR plot parameters  
 CX: 22.80 cm  
 FIP: 202.305 ppm  
 F1: 25442.43 Hz  
 F2P: -3.065 ppm  
 F2: -385.47 Hz  
 PH00H: 0.0043 ppm/cm  
 PC0H: 1132.80261 Hz/cm

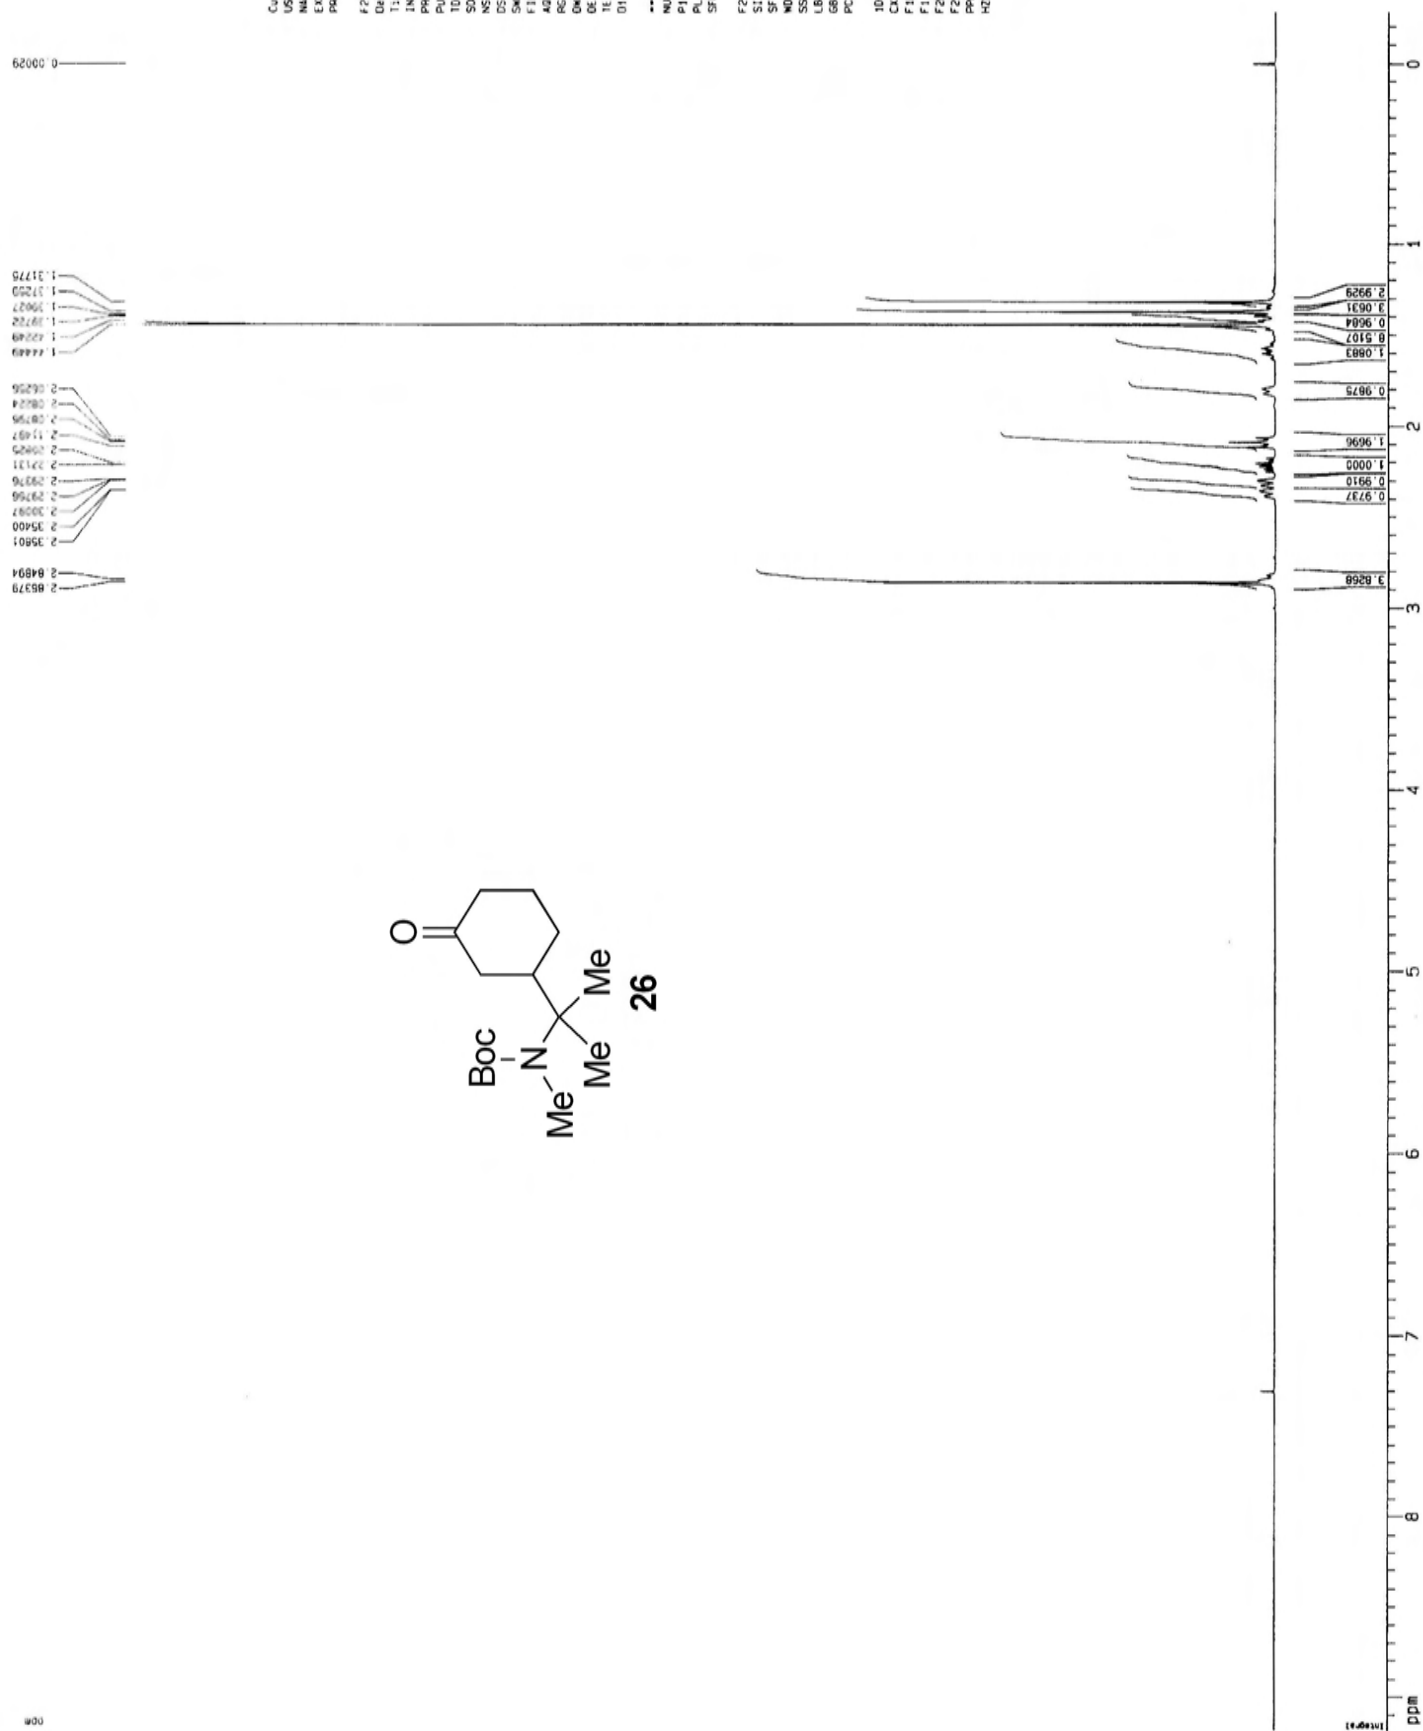



Current Data Parameters  
 USER: smolick  
 NAME: v266a  
 EPMAC: 2  
 PROCNO: 1

F2 - Acquisition Parameters  
 Date\_: 20040125  
 Time: 10.01  
 INSTRUM: gpc500  
 PULPROG: zgpg30  
 FIDRES: 0.462388 Hz  
 AQ: 1.0813940 sec  
 RG: 40296  
 INM: 16.500 uSAC  
 DE: 4.50 uSAC  
 TE: 300.0 K  
 D1: 0.25000000 sec  
 D11: 0.03000000 sec

----- CHANNEL f1 -----  
 NUC1: <sup>13</sup>C  
 P1: 15.00 uSAC  
 PL1: 0.00 dB  
 SF01: 125.7600000 MHz

----- CHANNEL f2 -----  
 CPDPRG2: waltz16  
 NUC2: <sup>1</sup>H  
 P2: 80.00 uSAC  
 PL2: -3.00 dB  
 PL12: 15.10 dB  
 SF02: 500.1530010 MHz

F2 - Processing parameters  
 SI: 65536  
 SF: 125.7628006 MHz  
 WDW: EM  
 SSB: 0  
 LB: 1.00 Hz  
 GB: 0  
 PC: 0.20

1D NMR plot parameters  
 CH1: 27.80 cm  
 FID: 203.662 cm  
 F1: 20153.47 Hz  
 F2: -2.859 cm  
 FPMCM: 9.94387 cm/cm  
 HZCM: 1250.56921 Hz/cm

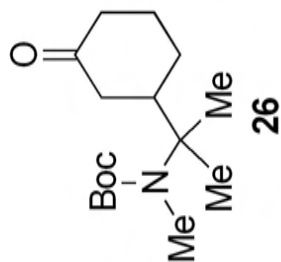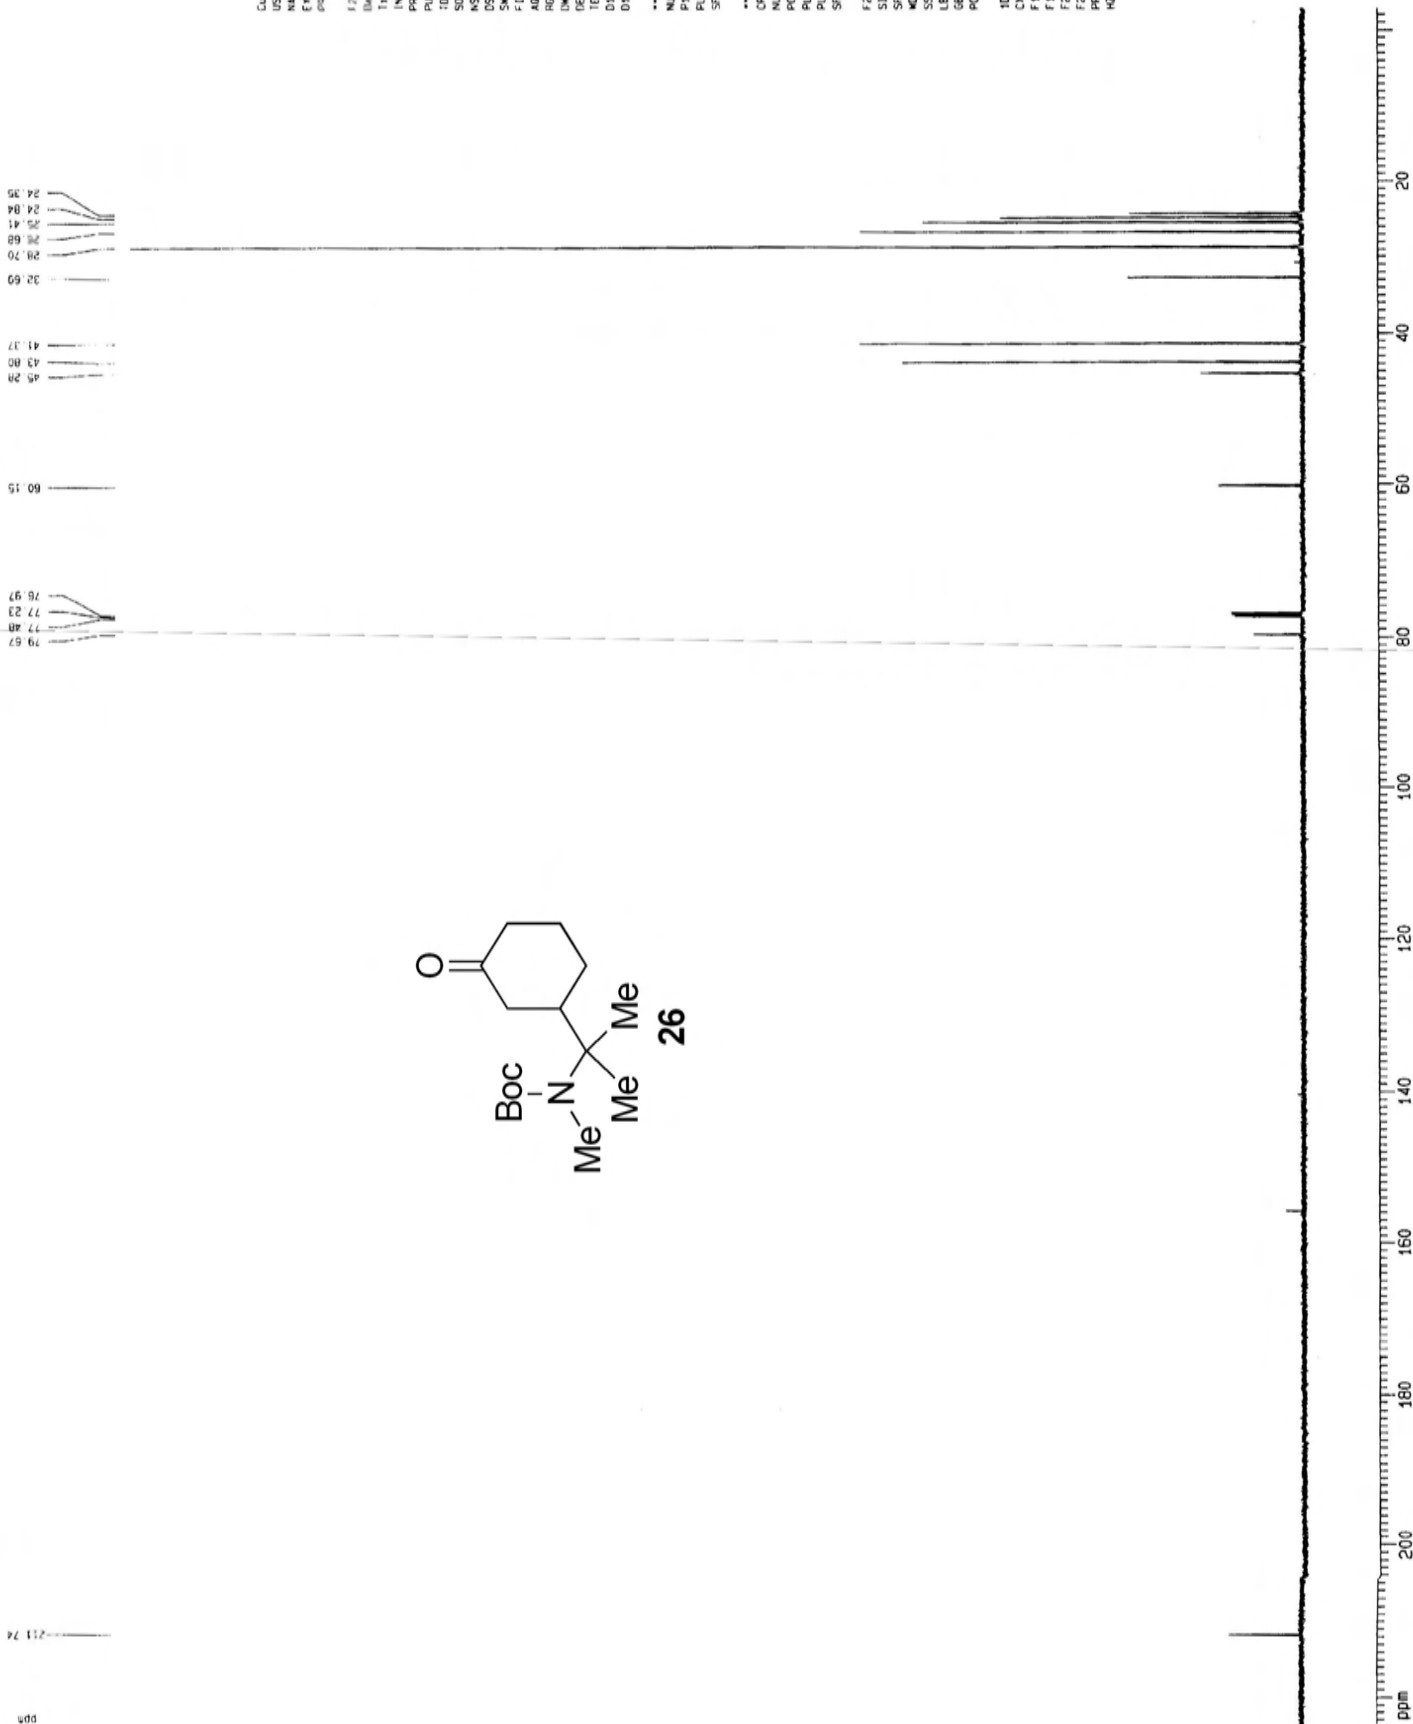

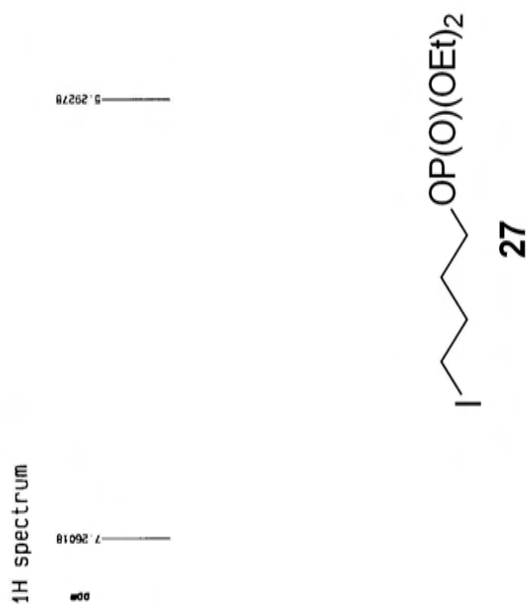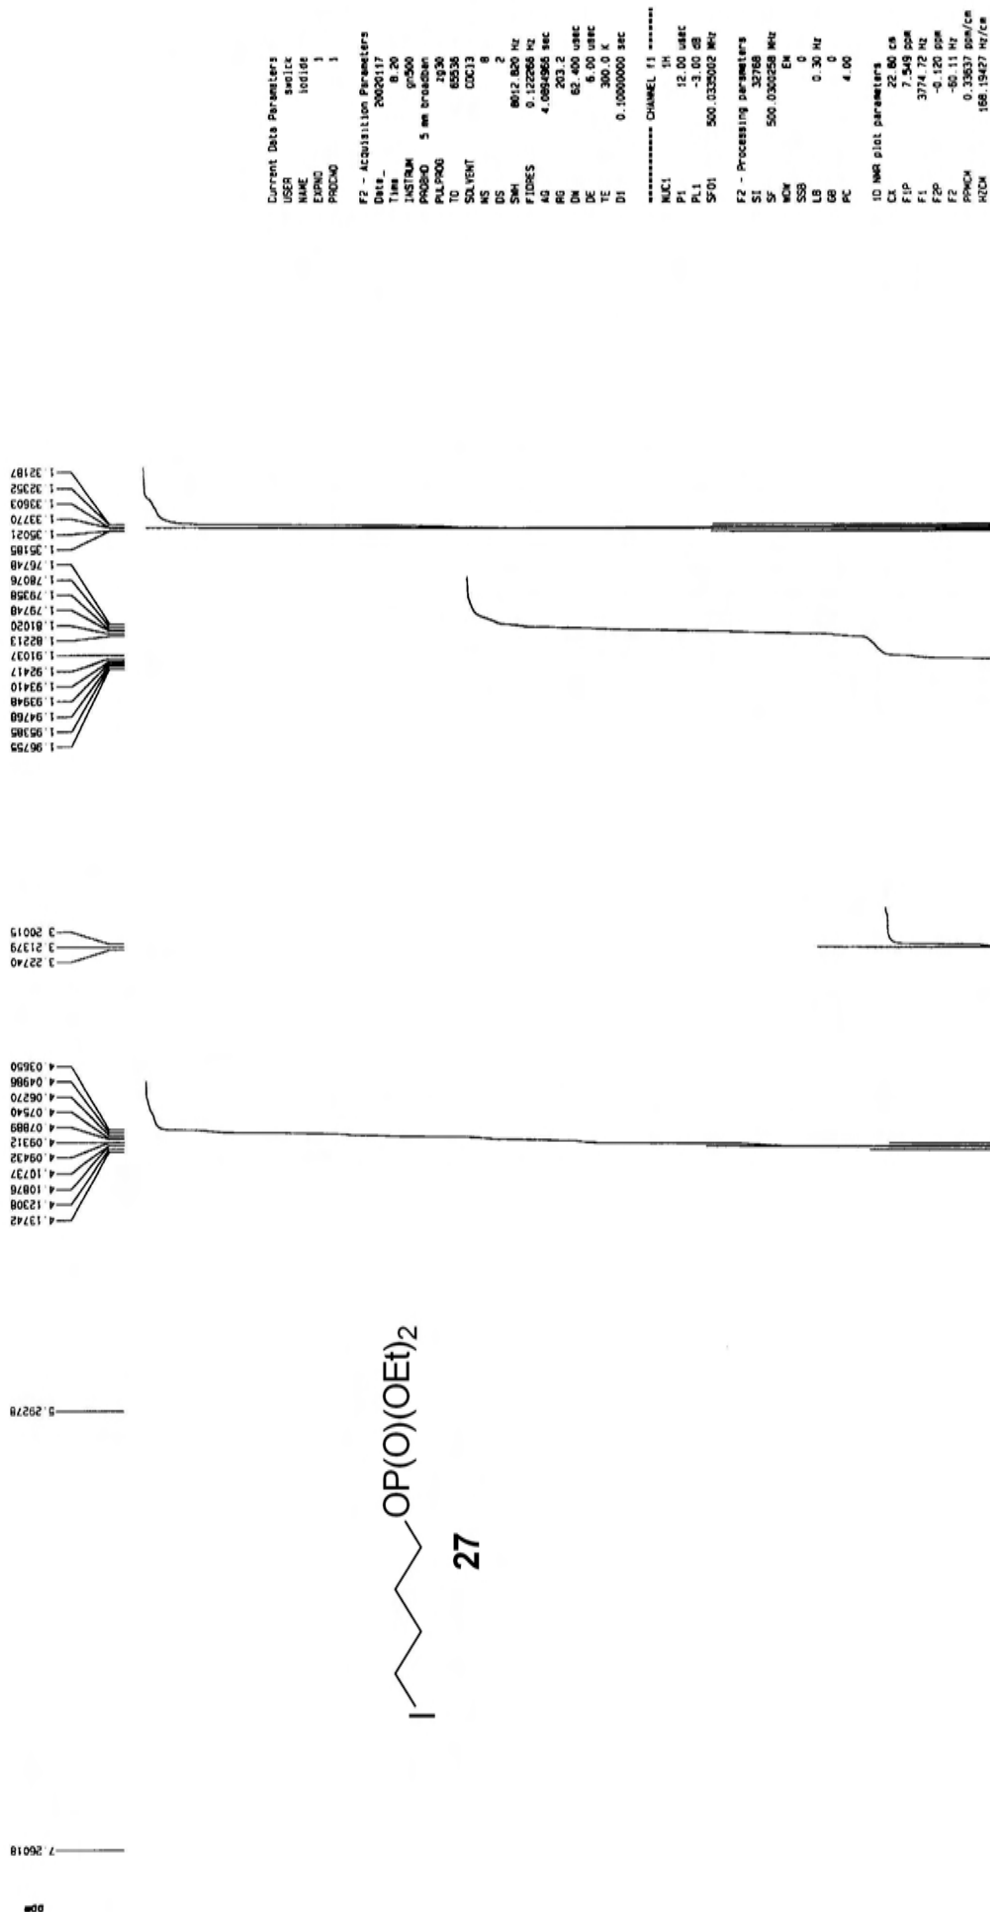

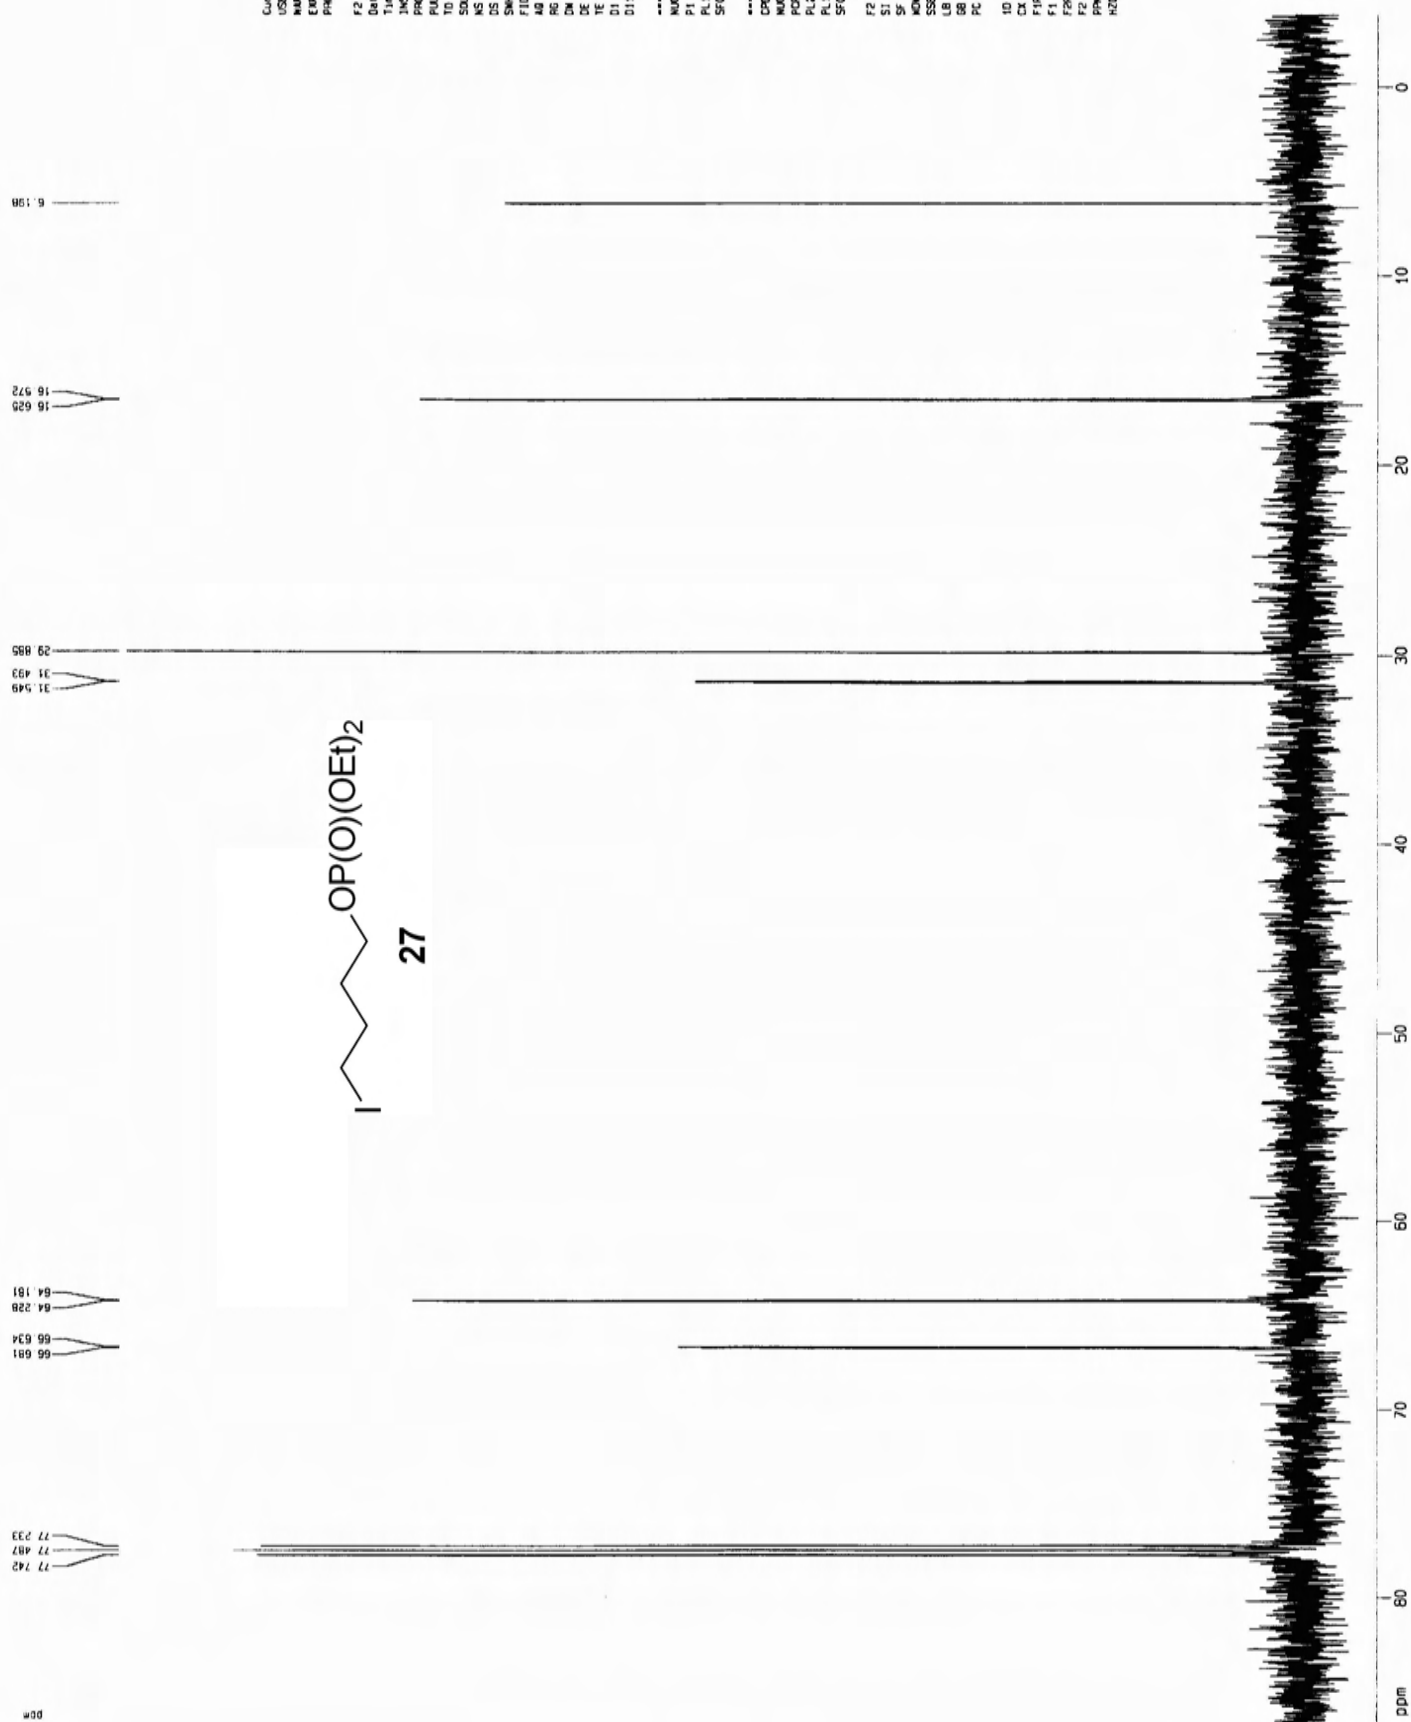

1.33119  
1.34532  
1.35845  
1.51086  
1.51086  
1.66211  
1.66350  
1.73314  
1.74547  
1.75102  
1.99824  
2.00764

4.04949  
4.06301  
4.10112  
4.11539  
4.11677  
4.12965  
4.13106

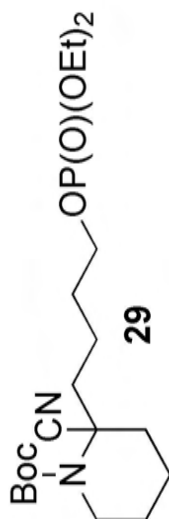

Current Data Parameters  
USER: smw  
NAME: 111214a  
PROCNO: 1  
PROBHD: 5 mm  
Date\_: 20040211  
Time: 19.42  
INSTRUM: omega500  
PROBHD: 5 mm  
PULPROG: zgpg30  
TO: 81726  
SOLVENT: CDCl3  
NS: 8  
DS: 2  
SWH: 6012.820 Hz  
FIDRES: 0.096043 Hz  
AQ: 5.0969774 sec  
RG: 32  
AQ: 62.400 sec  
DE: 4.00 sec  
TE: 300.0 K  
D1: 0.10000000 sec  
\*\*\*\*\* CHANNEL f1 \*\*\*\*\*  
NUC1: 1H  
P1: 13.00 usec  
PL1: -1.00 dB  
PR01: 900 MHz  
F2 - Processing parameters  
SI: 80036  
SF: 500 MHz  
WDW: EM  
SSB: 0  
LB: 0.30 Hz  
GB: 0  
PC: 4.00  
ID: NMR D101 parameters  
CX: 22.80 cm  
FIP: 9.209 cm  
F1: 4605.45 Hz  
F2: -0.450 cm  
F3: -230.19 Hz  
PPH1: 0.42408 ppm/cm  
NUC2: 212.13353 Hz/cm

SMW-111-214a  
500 MHz  
CDCl3  
1H SPECTRUM

ppm

Integr.

ppm

Spectrum with 1H decoupling

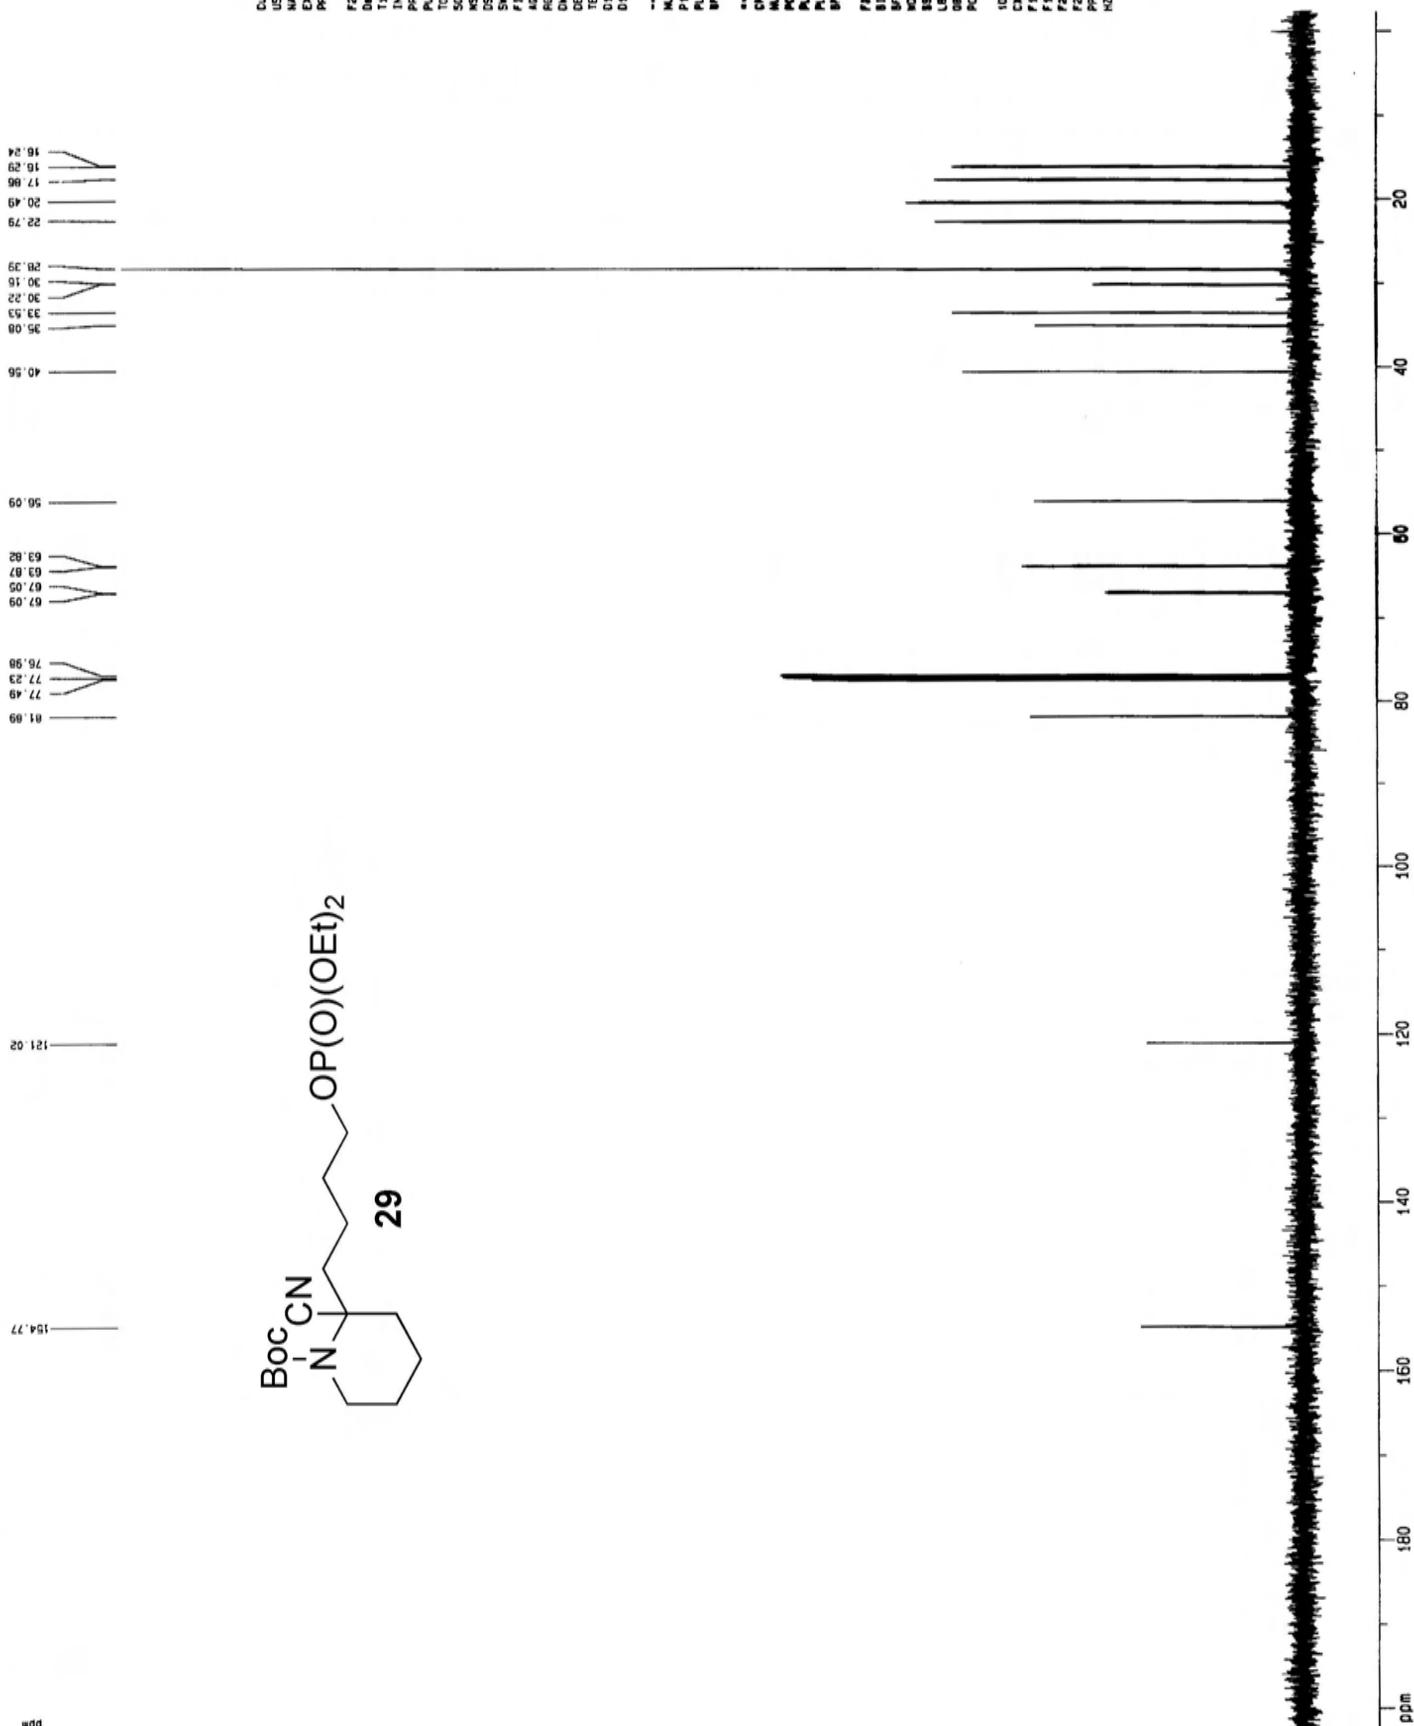

Current Data Parameters  
USER swick  
NAME 111214a  
EXPNO 2  
PROCNO 1

F2 - Acquisition Parameters  
Date\_ 20040211  
Time 19.44  
INSTRUM oegav300  
PROBHD 5 mm broadband  
PULPROG zgpg30  
TD 65536  
SOLVENT CDCl3  
NS 128  
DS 4  
SWH 30303.031 Hz  
FIDRES 0.462386 Hz  
AQ 1.0813540 sec  
RG 5160.6  
DM 18.500 usec  
DE 4.50 usec  
TE 300.2 K  
D1 0.25000000 sec  
D11 0.03000000 sec

----- CHANNEL f1 -----  
NUC1 13C  
P1 22.50 usec  
PL1 -1.00 dB  
PR1 135.794500 MHz

----- CHANNEL f2 -----  
CPDPRG2 waltz16  
NUC2 1H  
P2 80.00 usec  
PL2 -1.00 dB  
PR2 400.146000 MHz

F2 - Processing parameters  
SI 65536  
SF 125.766475 MHz  
WDW EM  
SSB 0  
LB 1.00 Hz  
GB 0  
PC 2.00

1D NMR plot parameters  
SI 65536  
SF 125.766475 MHz  
WDW EM  
SSB 0  
LB 1.00 Hz  
GB 0  
PC 2.00

2D NMR plot parameters  
SI 65536  
SF 125.766475 MHz  
WDW EM  
SSB 0  
LB 1.00 Hz  
GB 0  
PC 2.00

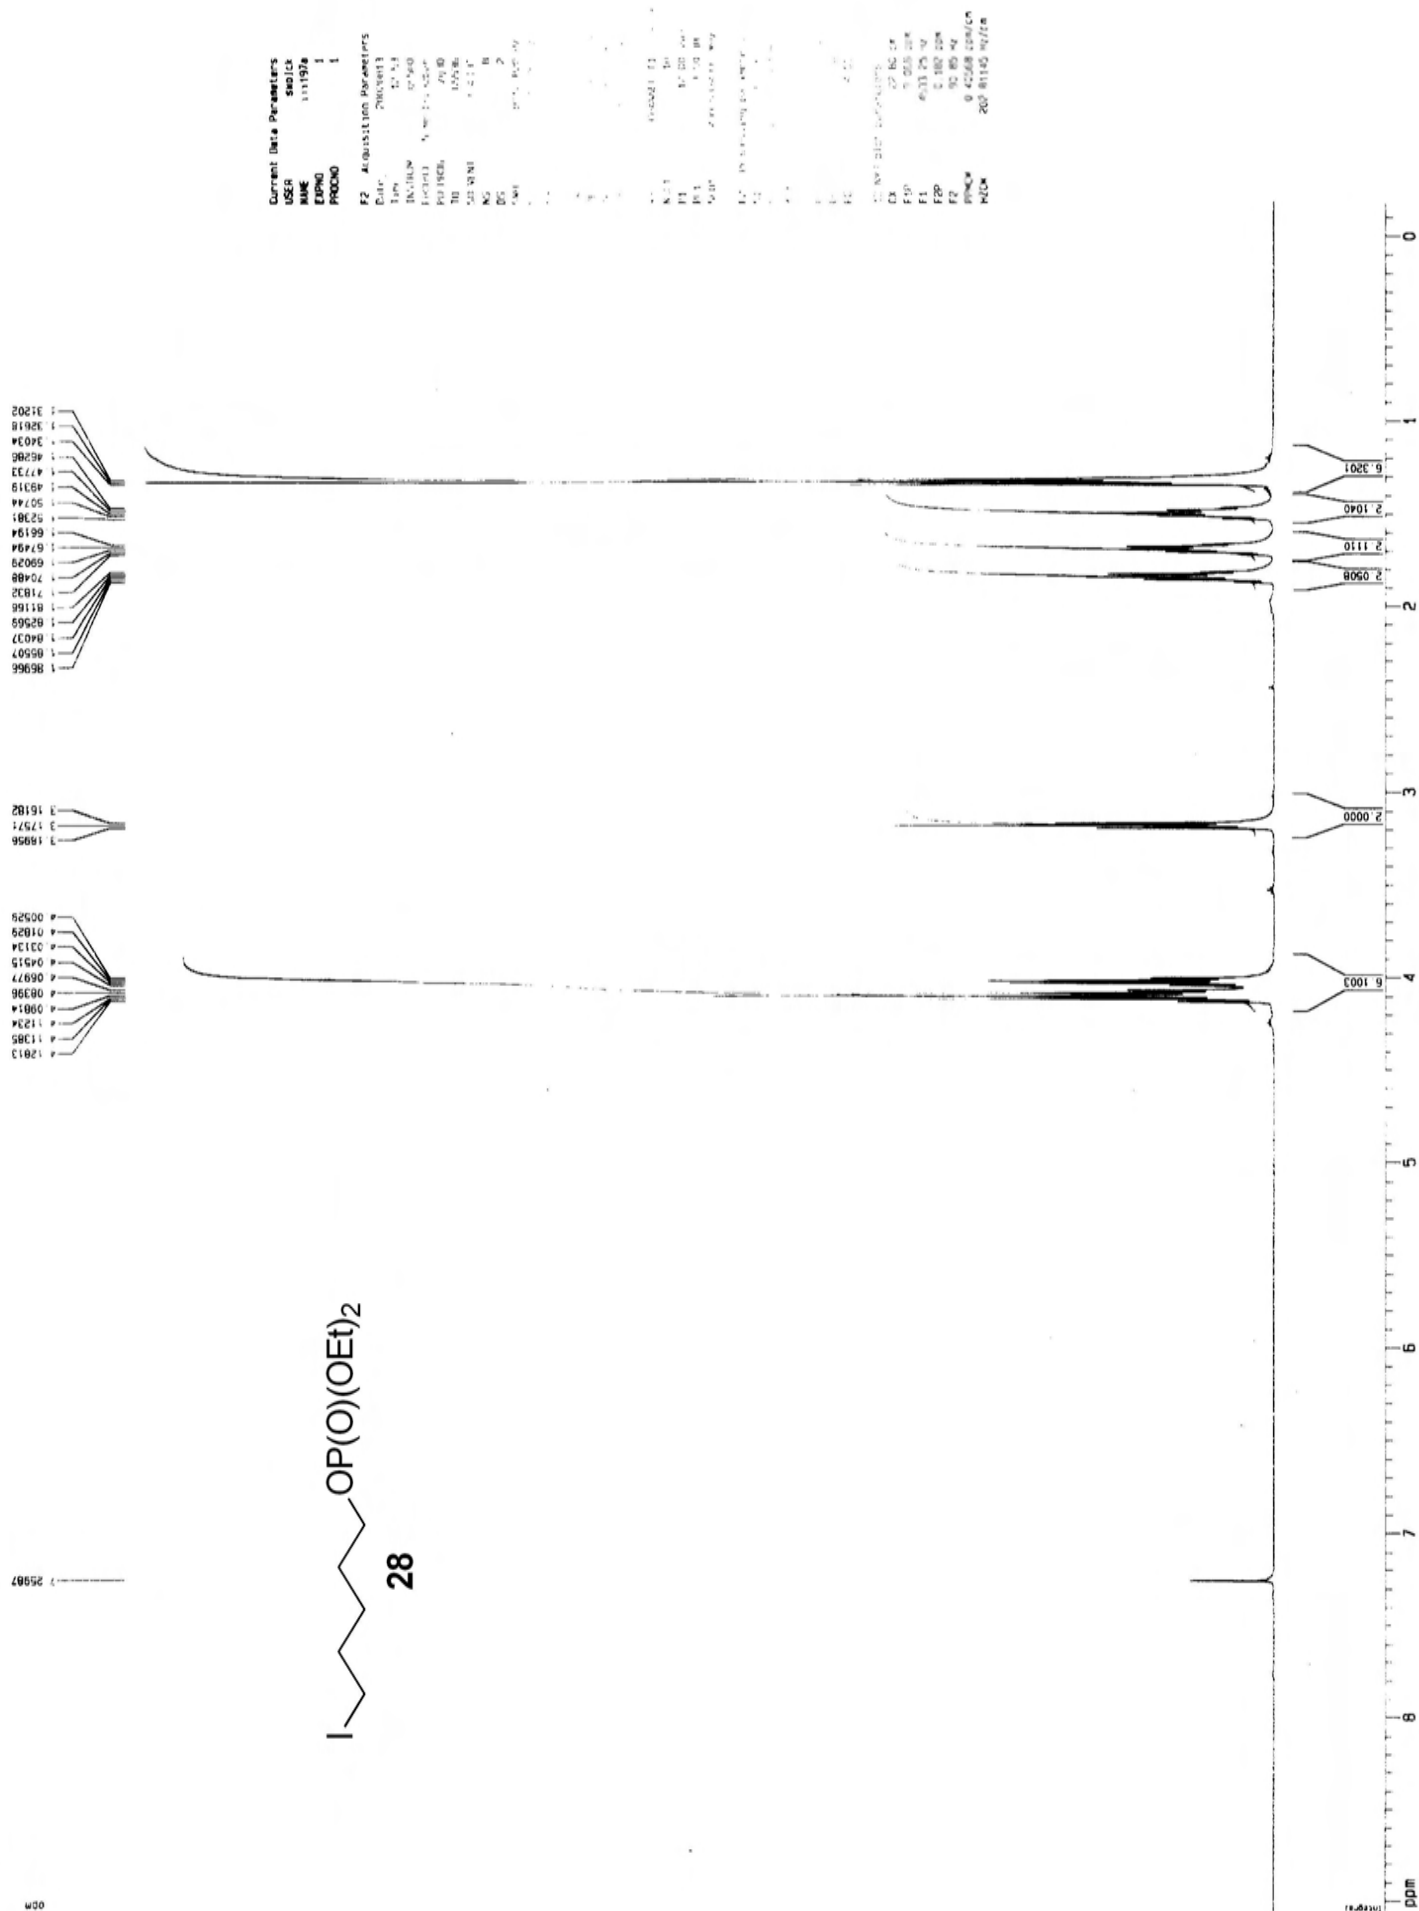

11-197A  
100 MHz  
CDCl<sub>3</sub>  
13C spectrum with 1H decoupling

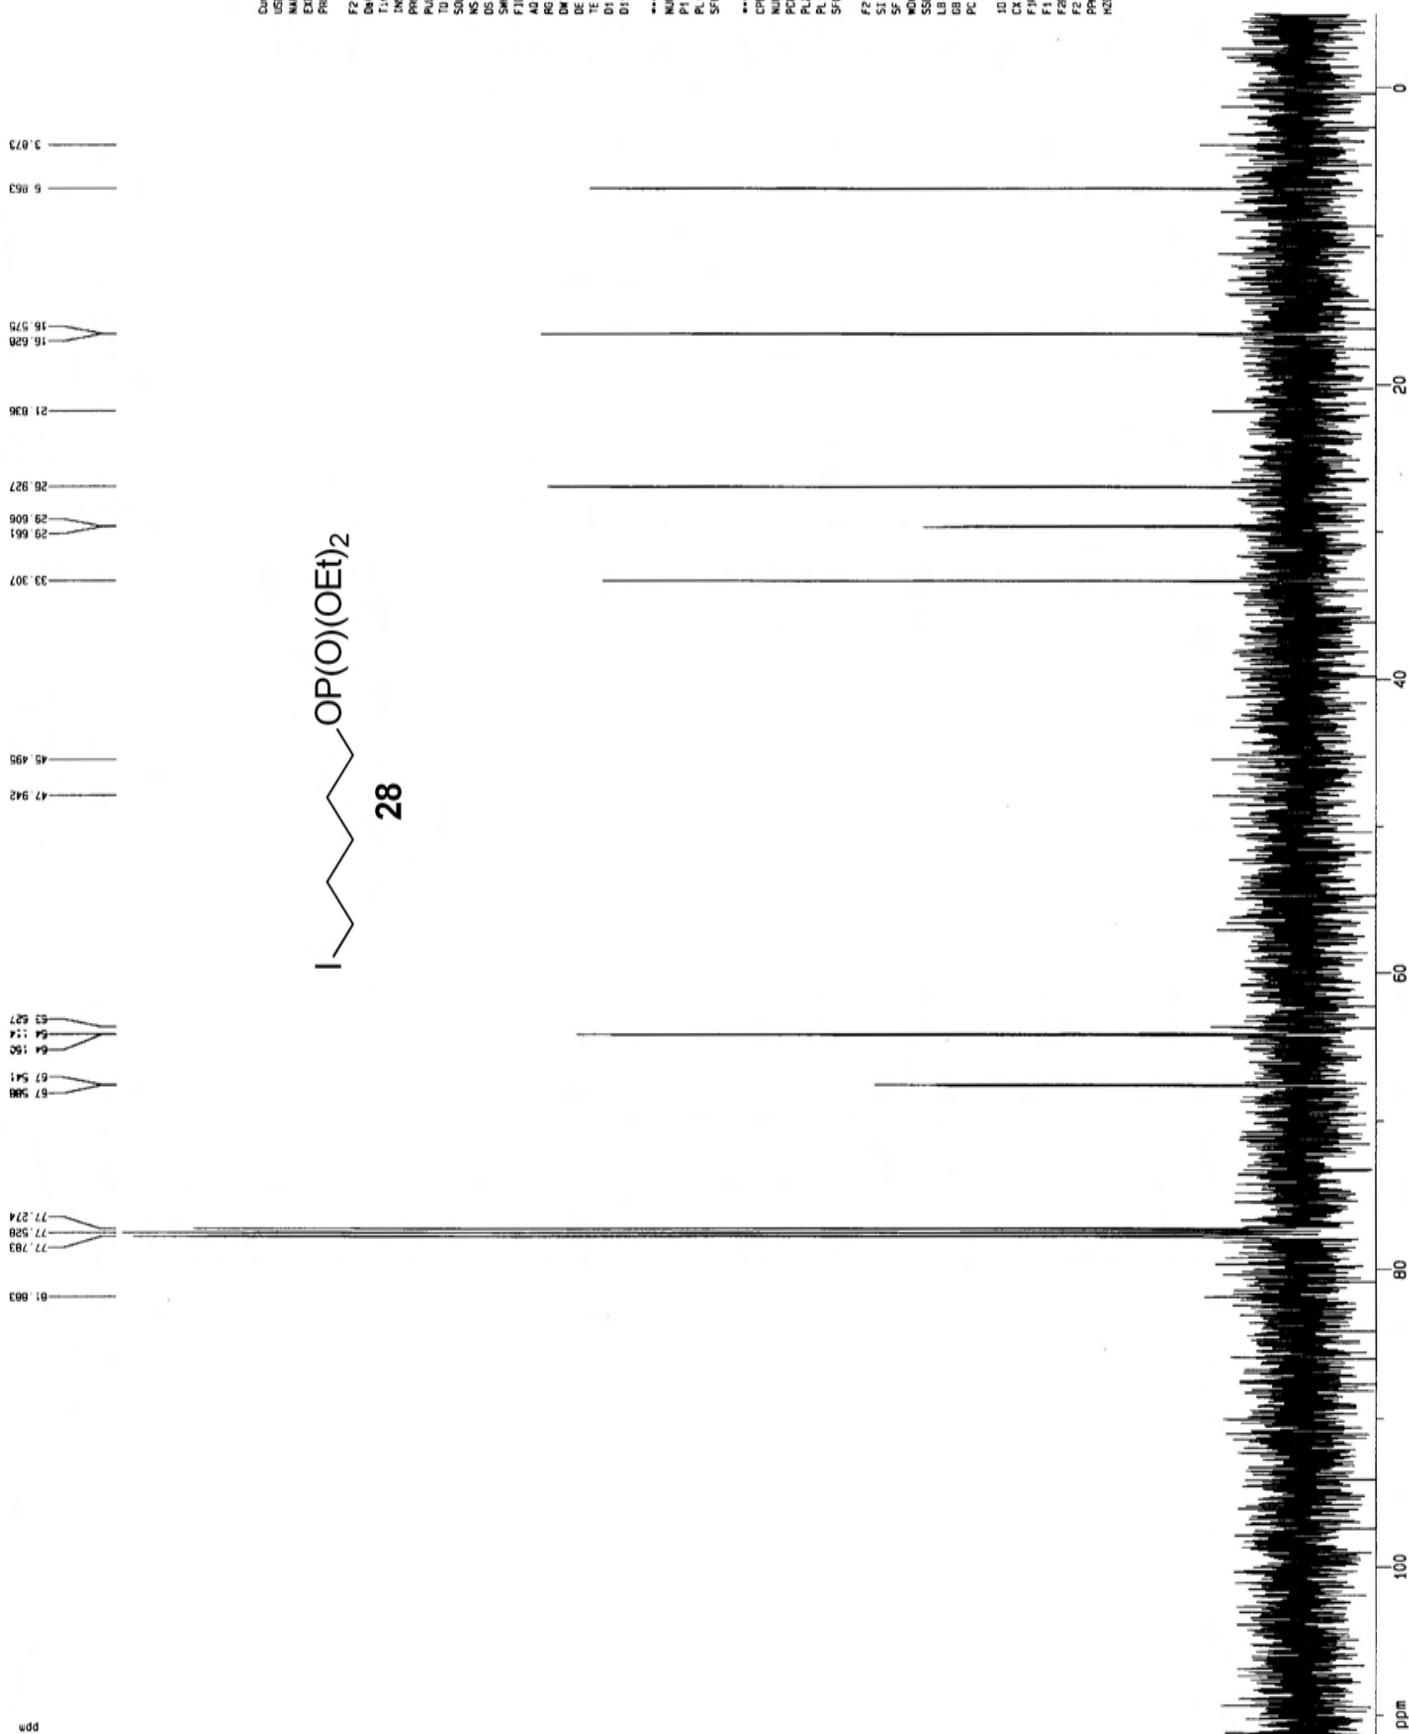

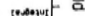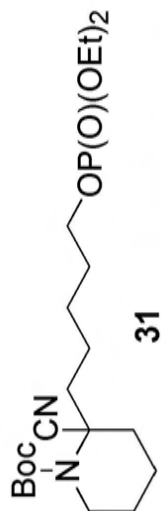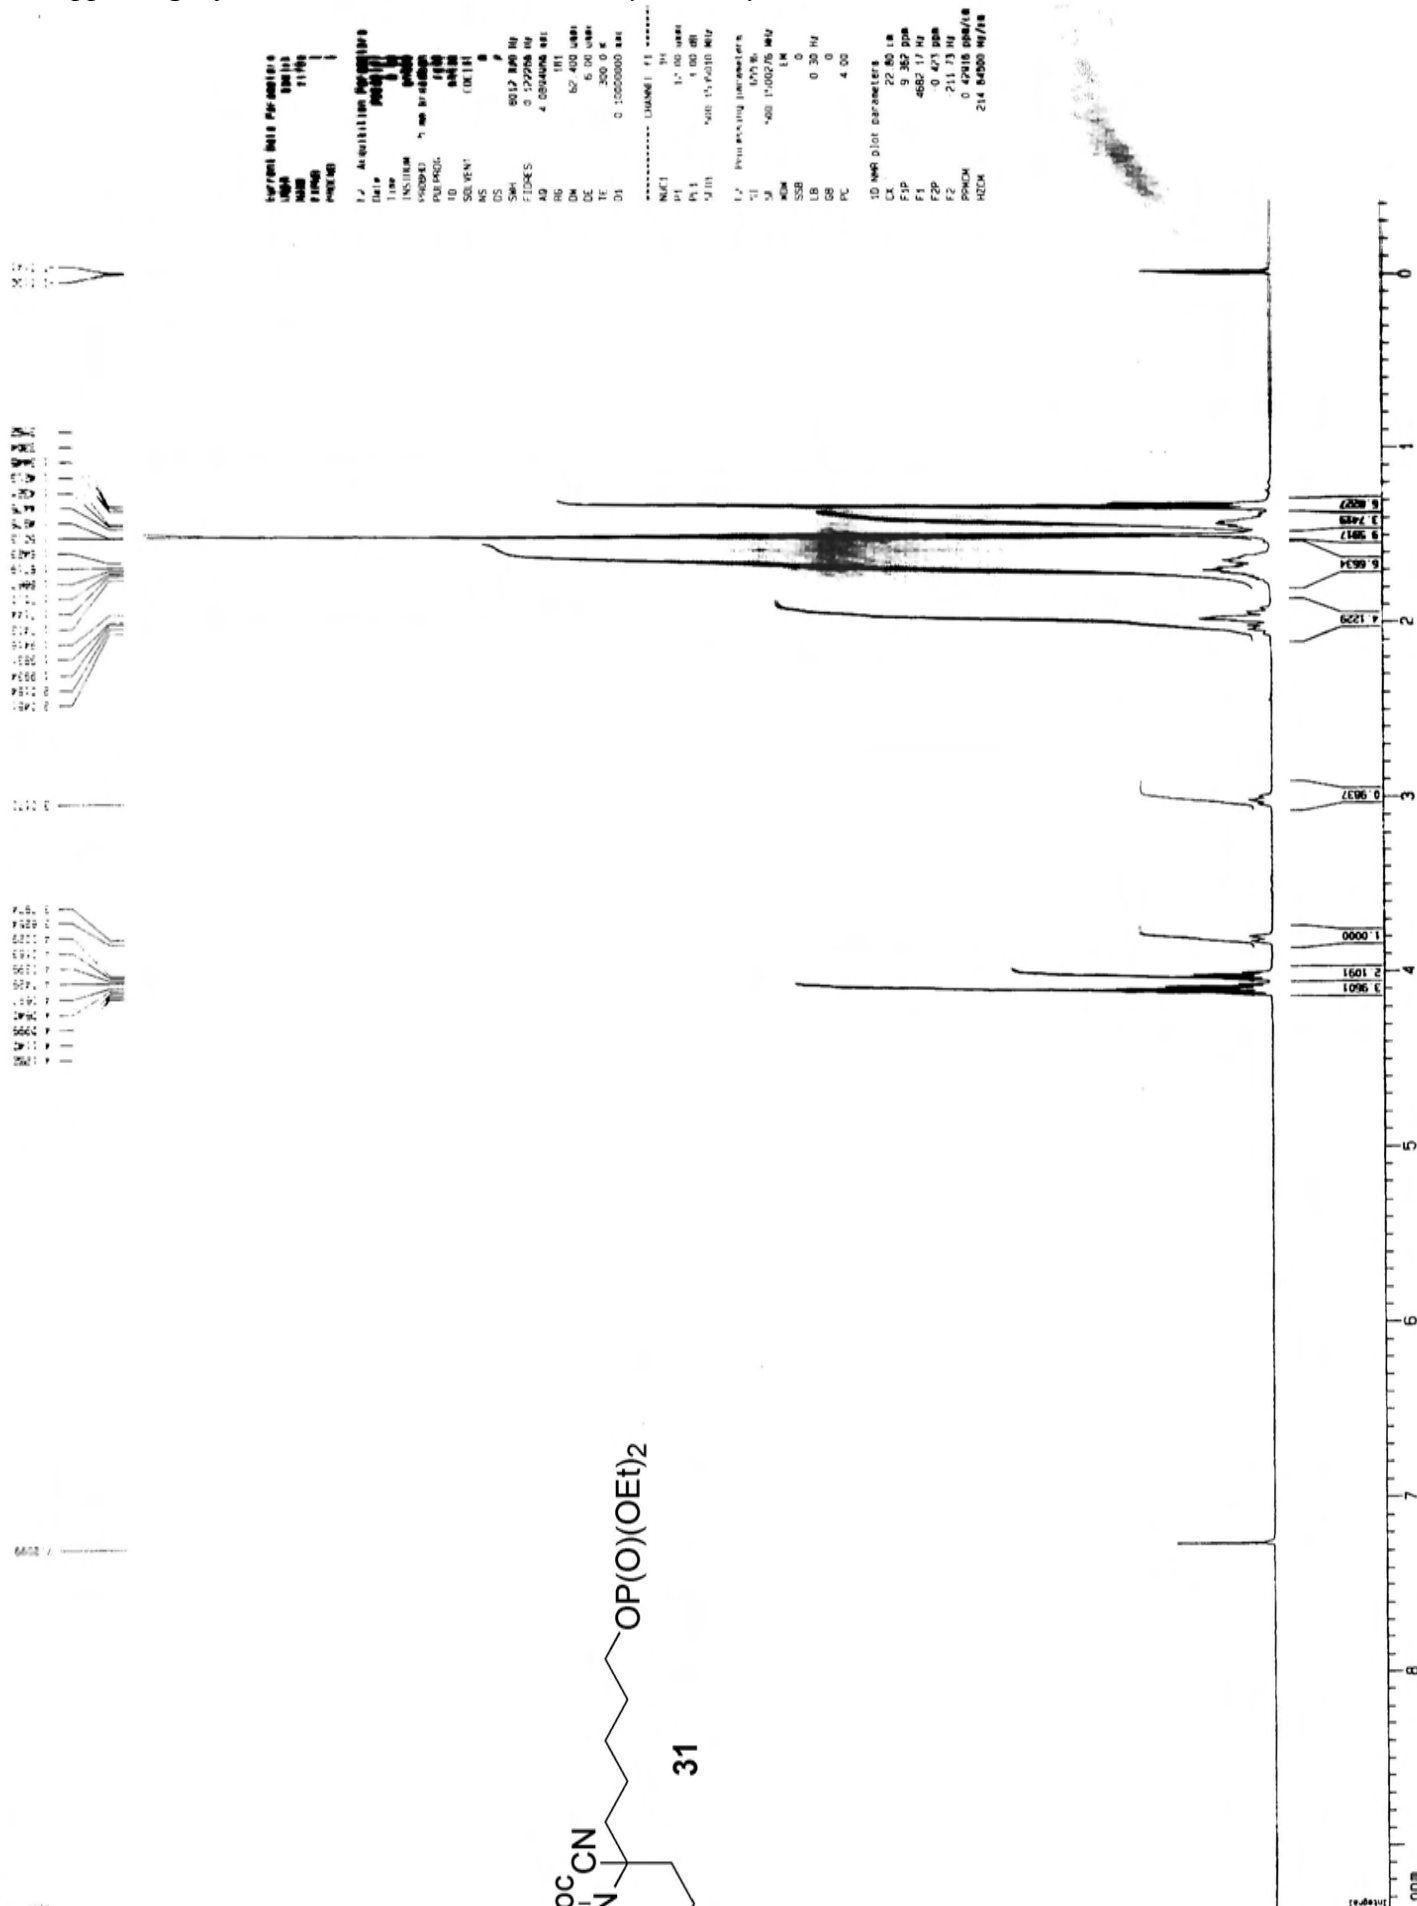



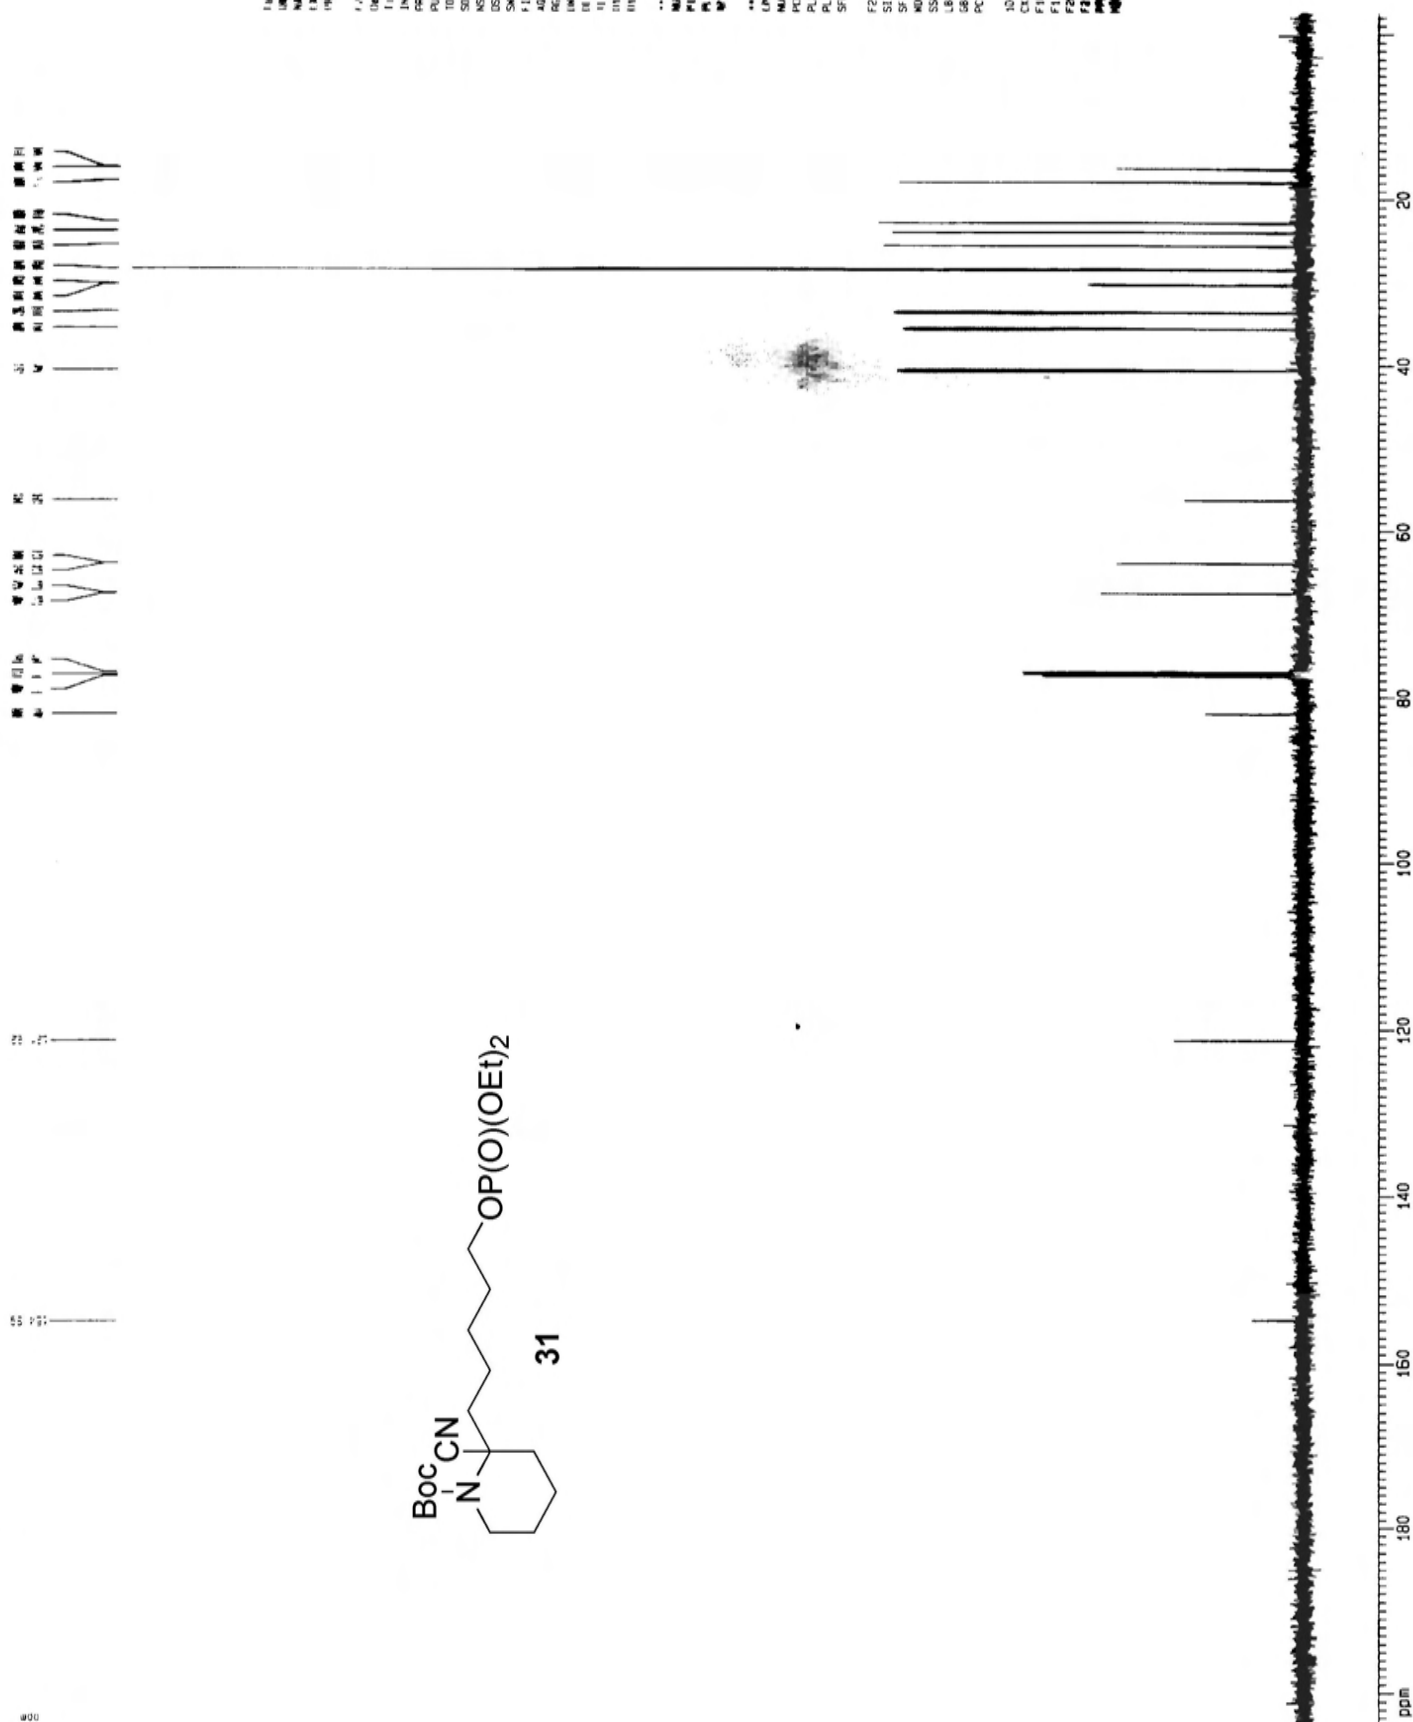

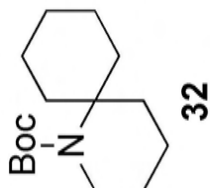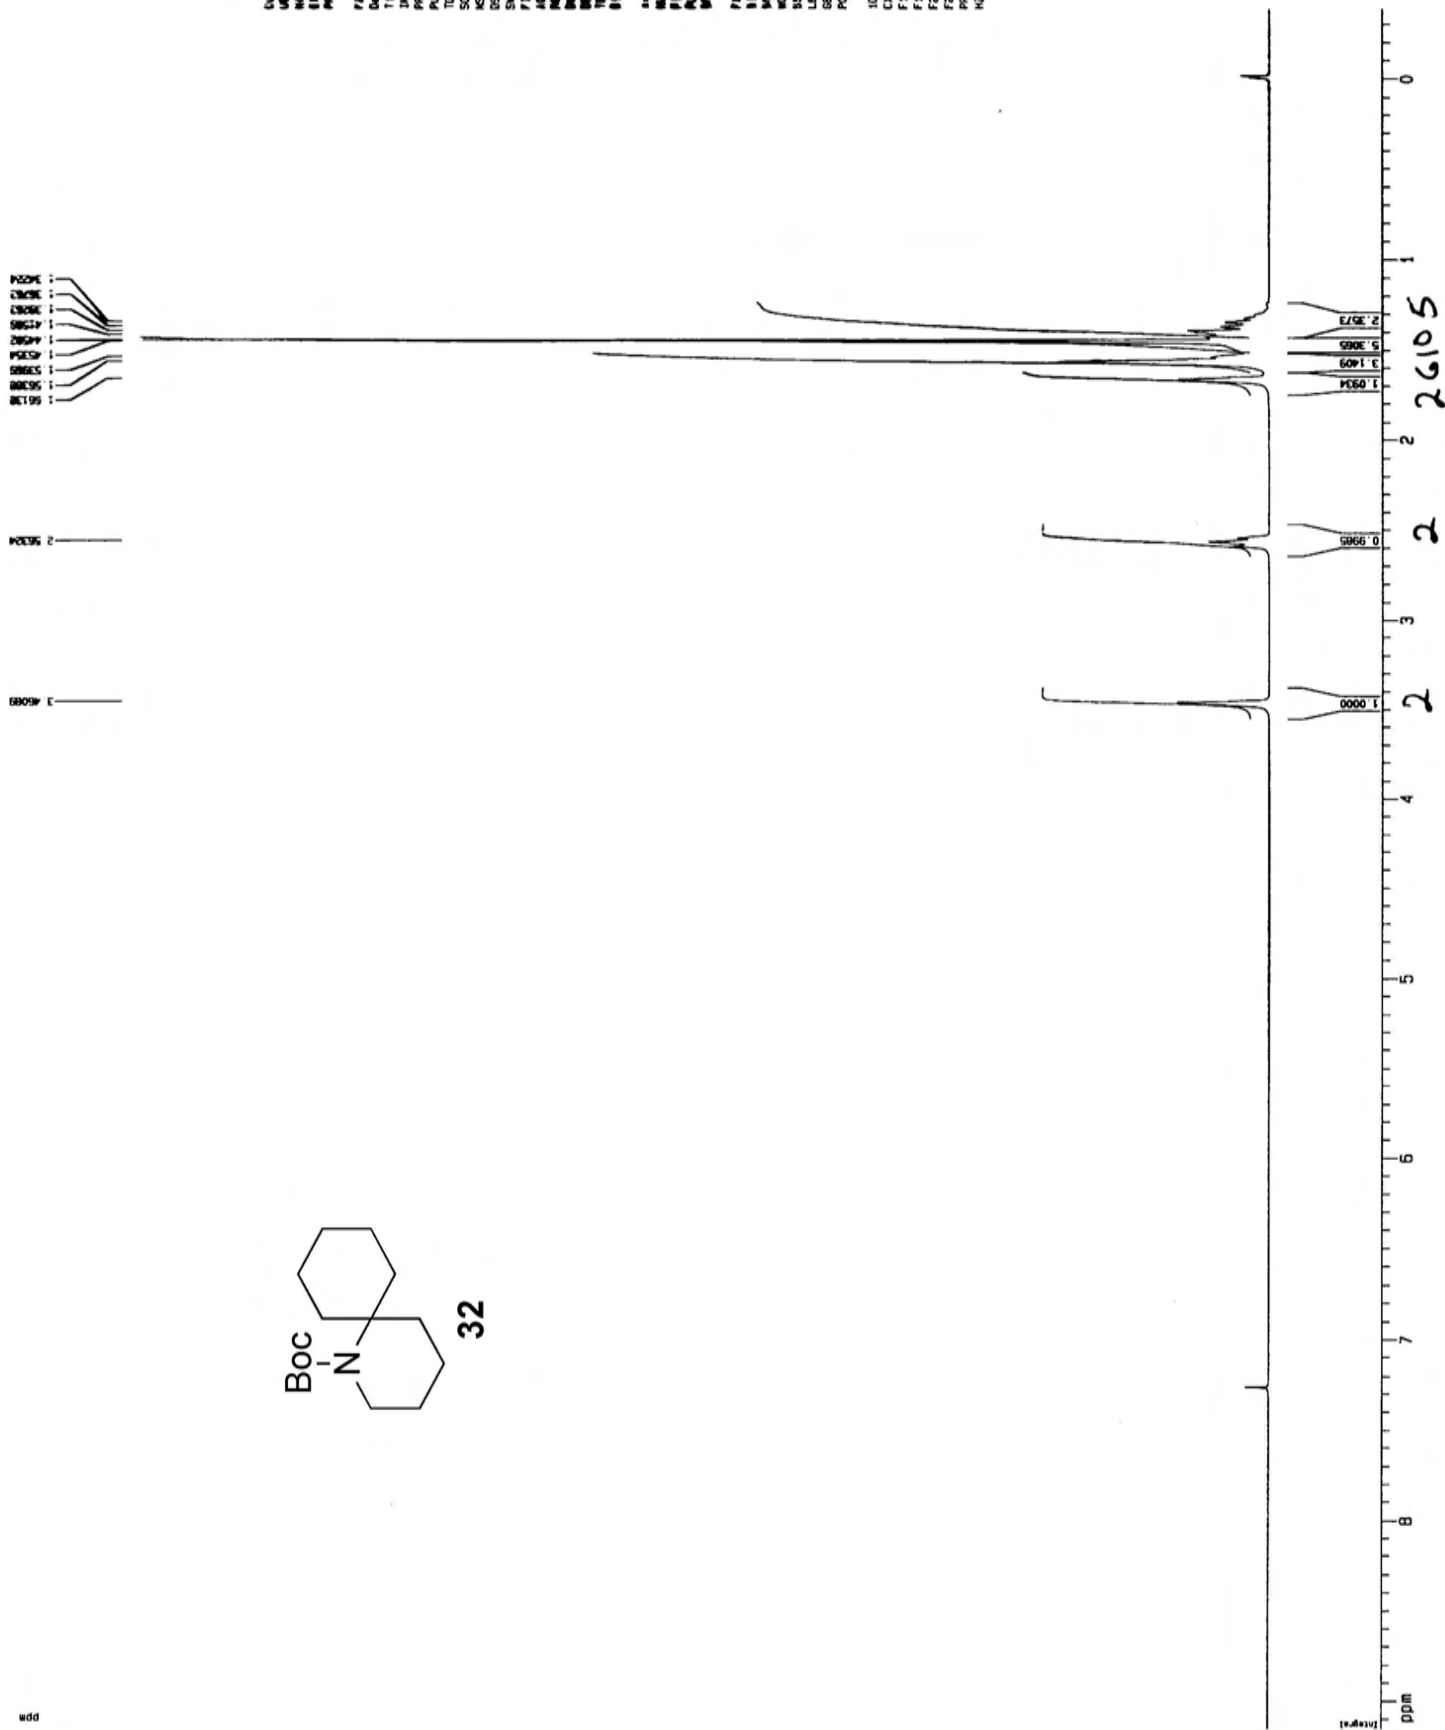

SAM-VI-11A  
500 MHz  
CDCl<sub>3</sub>  
1H spectrum

13C spectrum with 1H decoupling

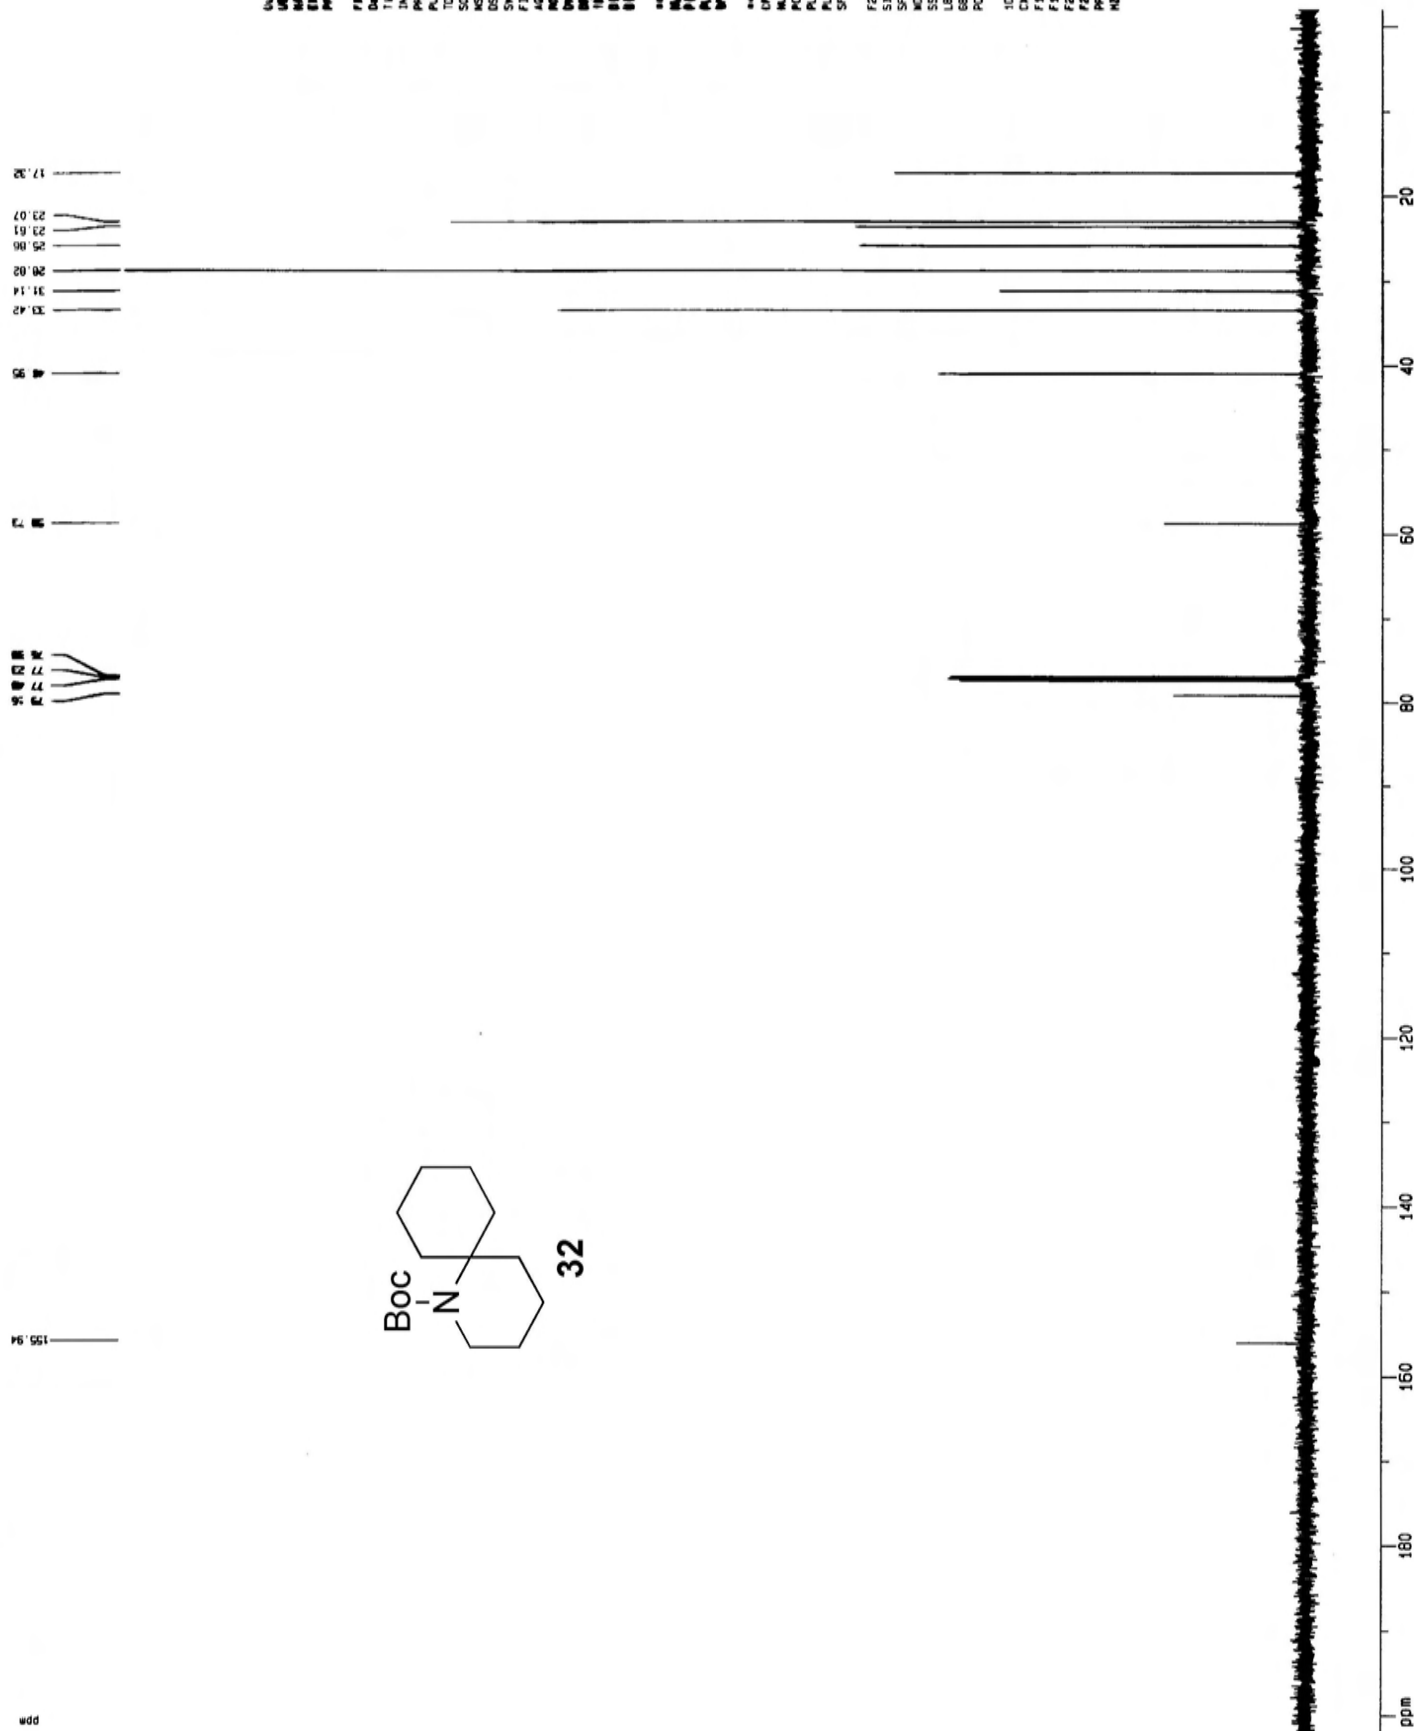

Current Data Parameters  
 Date\_ 09/09/10  
 Time 14:00  
 INSTRUM spect  
 PROBR 13H  
 PULPROG zgpg30  
 TO 1000000  
 SOLVENT CDCl3  
 NS 171  
 DS 4  
 SWH 30303.031 Hz  
 FIDRES 0.462300 Hz  
 AQ 1.0813640 sec  
 RG 9192.2  
 DW 16.500 usec  
 DE 4.50 usec  
 TE 300.0 K  
 D1 0.0000000 sec  
 B1 0.0000000 sec  
 B11 0.0000000 sec

===== CHANNEL f1 =====  
 NU1 13C  
 PR1 32.50 usec  
 PL1 -5.00 dB  
 RF1 125.762048 MHz

===== CHANNEL f2 =====  
 CPDPRG2 waltz16  
 MUX2 SH  
 PCPD2 80.00 usec  
 PL2 -1.00 dB  
 PL12 14.40 dB  
 SF02 500.223013 MHz

F2 - Processing parameters  
 SI 65536  
 SF 125.7603592 MHz  
 MDW EN  
 SSB 0  
 LB 1.00 Hz  
 GB 0  
 PC 2.00

10 MS plot parameters  
 CX 30.00 sec  
 FIP 202.837 sec  
 F1 20414.37 Hz  
 F2 -1.000 sec  
 F2 -200.00 Hz  
 PRACH 8.84687 sec/cyc  
 MICH 1100.00000 Hz/sec
